# Supplementary material for: Contrasting population genetic structure in three aggregating groupers (Percoidei: Epinephelidae) in the Indo-West Pacific: the importance of reproductive mode
Source: PubMed Central journal article supplement (PMC6278153; doi:10.1186/s12862-018-1284-0), 2018-12-04
Supplement: 12862_2018_1284_MOESM1_ESM.pdf [file 12862_2018_1284_MOESM1_ESM.pdf]

## Additional file 1

### Additional details of sampling, methodology, and results

Table S1. Primers used for PCR amplification of control region sequences.

| Primer   | Direction | Sequence (5'-3')         | Species                                   | Source     |
|----------|-----------|--------------------------|-------------------------------------------|------------|
| EP CR F2 | Forward   | AGCATATATACGGTTCAACCATTC | <i>E. polyphkadion</i>                    | This study |
| 12S R    | Reverse   | GCGGAGGCTTGCATGTGTA      | <i>E. polyphkadion</i>                    | 1          |
| ThrF     | Forward   | TCAAACGACGGTCTTGTA       | <i>P. areolatus</i> , <i>P. leopardus</i> | This study |
| CR-PA-R  | Reverse   | TTCTTGCTAGGTGGGTAACGAGT  | <i>P. areolatus</i> , <i>P. leopardus</i> | This study |

<sup>1</sup> Miya M, Nishida M. Organization of the mitochondrial genome of a deep-sea fish, *Gonostoma gracile* (Teleostei: Stomiiformes): first example of transfer RNA gene rearrangements in bony fishes. *Mar Biotech.* 1999; 1: 416-426.

Table S2. *Epinephelus polyphkadion* control region (723 bp) statistics required for estimating genetic diversity (h and  $\pi$ ).

| Sampling sites                        | Code | N               | Na         | h            | h stdev      | $\pi$        | $\pi$ stdev  | $\tau$       | $\tau$ 2.5%  | $\tau$ 97.5%  |
|---------------------------------------|------|-----------------|------------|--------------|--------------|--------------|--------------|--------------|--------------|---------------|
| Pacific Ocean + Eastern Indian Ocean* | EIWP | 243             | 156        | 0.992        | 0.002        | 0.024        | 0.012        | 6.730        | 3.221        | 26.018        |
| French Polynesia                      | TM   | 16              | 4          | 0.350        | 0.148        | 0.001        | 0.001        | 0.445        | 0.000        | 1.107         |
| Fiji                                  | FJ   | 35              | 30         | 0.992        | 0.009        | 0.021        | 0.011        | 6.926        | 3.238        | 19.416        |
| New Caledonia                         | NC   | 29              | 21         | 0.966        | 0.022        | 0.023        | 0.012        | 3.180        | 0.639        | 28.342        |
| Pohnpei                               | PO   | 17              | 13         | 0.963        | 0.033        | 0.025        | 0.013        | 17.504       | 4.238        | 27.527        |
| Palau                                 | PL   | 38              | 33         | 0.992        | 0.009        | 0.027        | 0.014        | 18.037       | 10.336       | 29.004        |
| Philippines                           | PH   | 33              | 27         | 0.989        | 0.010        | 0.025        | 0.013        | 21.248       | 12.393       | 25.705        |
| +Dumaguete, Philippines <sup>^</sup>  | PD   | 8 <sup>^</sup>  | 8          | 1.000        | 0.063        | 0.023        | 0.013        | 19.547       | 9.932        | 24.482        |
| +Cebu, Philippines                    | PC   | 19 <sup>^</sup> | 18         | 0.994        | 0.019        | 0.028        | 0.014        | 22.027       | 15.648       | 25.652        |
| +Palawan, Philippines <sup>^</sup>    | PW   | 6 <sup>^</sup>  | 5          | 0.933        | 0.122        | 0.020        | 0.012        | 0.000        | 0.000        | 22.820        |
| Okinawa <sup>§</sup>                  | OK   | 2 <sup>§</sup>  | 2          | 1.000        | 0.500        | 0.027        | 0.028        | 0.000        | 0.000        | 0.000         |
| Bangkok <sup>§</sup>                  | TH   | 2 <sup>§</sup>  | 11         | 1.000        | 0.500        | 0.021        | 0.022        | 0.000        | 0.000        | 0.000         |
| Western Australia                     | WA   | 34              | 25         | 0.977        | 0.014        | 0.024        | 0.012        | 22.715       | 11.504       | 28.061        |
| +Scott Reef, Western Australia        | SR   | 16              | 15         | 0.992        | 0.025        | 0.027        | 0.014        | 22.787       | 13.641       | 27.072        |
| +Rowley Shoals, Western Australia     | CR   | 18              | 12         | 0.941        | 0.039        | 0.020        | 0.010        | 5.898        | 1.824        | 28.105        |
| Cocos (Keeling) Islands               | CK   | 36              | 20         | 0.948        | 0.020        | 0.028        | 0.014        | 30.236       | 1.186        | 37.240        |
| Indian Ocean                          | IO   | 27              | 23         | 0.989        | 0.013        | 0.026        | 0.013        | 12.273       | 5.990        | 32.676        |
| Phuket <sup>§</sup>                   | PK   | 4 <sup>§</sup>  | 3          | 0.833        | 0.222        | 0.023        | 0.016        | 14.363       | 5.957        | 28.105        |
| Maldives                              | ML   | 23              | 21         | 0.992        | 0.015        | 0.027        | 0.014        | 11.225       | 4.998        | 37.098        |
| <b>All</b>                            |      | <b>270</b>      | <b>179</b> | <b>0.993</b> | <b>0.002</b> | <b>0.050</b> | <b>0.024</b> | <b>6.715</b> | <b>2.918</b> | <b>29.471</b> |

N: number of individuals analysed; Na: number of haplotypes; h: haplotype diversity,  $\pi$ : nucleotide diversity;  $\tau$  2.5% and 97.5%: 95% CI of Tau.

\* Eastern Indian Ocean includes Western Australia and Cocos Keeling in this dataset, as population genetics analyses find these two populations are more closely related to conspecifics in the Pacific Ocean than other Indian Ocean populations.

<sup>^</sup>Two of the Philippines populations have small sample sizes, all three Philippines populations were pooled in all subsequent analyses.

<sup>§</sup>Three populations have small sample sizes and are excluded from SAMOVA.

Table S3. *Plectropomus areolatus* control region (580 bp) statistics required for estimating genetic diversity (h and  $\pi$ ).

| Sampling sites                    | Code | N              | Na        | h            | h stdev      | $\pi$        | $\pi$ stdev  | $\tau$         | $\tau$ 2.50%   | $\tau$ 97.50%  |
|-----------------------------------|------|----------------|-----------|--------------|--------------|--------------|--------------|----------------|----------------|----------------|
| Pacific Ocean + Western Australia | PAC  | 196            | 44        | 0.813        | 0.027        | 0.004        | 0.002        | 2.633          | 0.592          | 4.570          |
| Fiji                              | FJ   | 21             | 11        | 0.848        | 0.070        | 0.003        | 0.002        | 1.910          | 0.609          | 2.986          |
| Solomon Islands                   | SI   | 15             | 5         | 0.705        | 0.088        | 0.003        | 0.002        | 2.480          | 0.000          | 4.969          |
| Torres Strait                     | TS   | 25             | 11        | 0.840        | 0.058        | 0.004        | 0.003        | 2.748          | 0.939          | 4.518          |
| Pohnpei                           | PO   | 28             | 9         | 0.762        | 0.073        | 0.003        | 0.002        | 2.547          | 0.195          | 5.270          |
| Palau                             | PL   | 15             | 7         | 0.800        | 0.083        | 0.004        | 0.002        | 2.668          | 0.607          | 4.902          |
| Philippines (Cebu)                | PC   | 32             | 13        | 0.875        | 0.042        | 0.004        | 0.003        | 2.873          | 1.068          | 4.627          |
| Indonesia                         | INS  | 22             | 11        | 0.905        | 0.043        | 0.005        | 0.003        | 2.719          | 1.379          | 3.781          |
| +Bali, Indonesia <sup>^</sup>     | BA   | 6 <sup>^</sup> | 5         | 0.933        | 0.122        | 0.006        | 0.004        | 1.596          | 0.000          | 3.178          |
| +Borneo, Indonesia <sup>^</sup>   | BO   | 1 <sup>^</sup> | 1         | 1.000        | 0.000        | 0.000        | 0.000        | 0.000          | 0.000          | 0.000          |
| +East Indonesia                   | IN   | 15             | 9         | 0.924        | 0.044        | 0.004        | 0.003        | 3.162          | 1.441          | 4.490          |
| Western Australia                 | WA   | 38             | 13        | 0.664        | 0.087        | 0.003        | 0.002        | 3.182          | 0.000          | 6.656          |
| +Scott Reef, Western Australia    | SR   | 18             | 8         | 0.641        | 0.130        | 0.003        | 0.002        | 0.000          | 0.000          | 0.473          |
| +Rowley Shoals, Western Australia | CR   | 20             | 7         | 0.690        | 0.105        | 0.003        | 0.002        | 2.688          | 0.000          | 5.527          |
| Indian Ocean                      | IO   | 65             | 17        | 0.873        | 0.030        | 0.004        | 0.002        | 2.695          | 1.105          | 4.313          |
| Cocos (Keeling) Islands           | CK   | 50             | 10        | 0.835        | 0.035        | 0.004        | 0.002        | 2.500          | 0.496          | 4.480          |
| Maldives                          | ML   | 15             | 9         | 0.924        | 0.044        | 0.004        | 0.003        | 2.635          | 1.010          | 4.057          |
| Red Sea                           | RS   | 80             | 38        | 0.752        | 0.055        | 0.003        | 0.002        | 2.217          | 0.277          | 4.836          |
| Jizan, Red Sea                    | JI   | 26             | 12        | 0.717        | 0.098        | 0.002        | 0.001        | 1.242          | 0.455          | 2.227          |
| Thuwal, Red Sea                   | TU   | 26             | 11        | 0.674        | 0.104        | 0.004        | 0.002        | 0.000          | 0.000          | 0.479          |
| Umluj, Red Sea                    | UM   | 28             | 17        | 0.852        | 0.067        | 0.004        | 0.002        | 2.166          | 0.809          | 3.566          |
| <b>All</b>                        |      | <b>341</b>     | <b>99</b> | <b>0.920</b> | <b>0.010</b> | <b>0.025</b> | <b>0.013</b> | <b>344.000</b> | <b>344.000</b> | <b>344.000</b> |

N: number of individuals analysed; Na: number of haplotypes; h: haplotype diversity,  $\pi$ : nucleotide diversity;  $\tau$  2.5% and 97.5%: 95% CI of Tau.

<sup>^</sup>Two of the Indonesian populations have small sample sizes and are excluded from SAMOVA.

Table S4. *Plectropomus leopardus* control region (556 bp) statistics required for estimating genetic diversity (h and  $\pi$ ).

| Sampling sites                       | Code | N          | Na         | h            | H stdev      | $\pi$        | $\pi$ stdev  | $\tau$        | $\tau$ 2.50% | $\tau$ 97.50% |
|--------------------------------------|------|------------|------------|--------------|--------------|--------------|--------------|---------------|--------------|---------------|
| Eastern Population*                  | East | 97         | 58         | 0.933        | 0.021        | 0.052        | 0.025        | 36.176        | 10.041       | 43.387        |
| Fiji                                 | FJ   | 30         | 7          | 0.366        | 0.112        | 0.001        | 0.001        | 1.895         | 0.000        | 4.301         |
| New Caledonia                        | NC   | 16         | 10         | 0.867        | 0.079        | 0.020        | 0.011        | 9.352         | 3.846        | 20.117        |
| Solomon Islands                      | SI   | 12         | 12         | 1.000        | 0.034        | 0.016        | 0.009        | 3.281         | 0.352        | 9.424         |
| Capricorn Bunker Group, QLD          | CB   | 19         | 16         | 0.983        | 0.022        | 0.029        | 0.015        | 4.871         | 1.232        | 28.543        |
| Torres Strait                        | TS   | 20         | 18         | 0.990        | 0.019        | 0.025        | 0.013        | 2.428         | 0.393        | 15.838        |
| Western Population*                  | West | 243        | 125        | 0.980        | 0.004        | 0.040        | 0.020        | 28.453        | 8.719        | 33.613        |
| Indonesia                            | INS  | 23         | 15         | 0.917        | 0.044        | 0.038        | 0.019        | 27.914        | 7.836        | 33.678        |
| +East Indonesia                      | EI   | 17         | 13         | 0.927        | 0.058        | 0.040        | 0.021        | 28.375        | 6.090        | 34.307        |
| +Borneo^                             | BO   | 3^         | 3          | 1.000        | 0.272        | 0.033        | 0.025        | 4.225         | 1.055        | 22.834        |
| +Bali^                               | BA   | 3^         | 2          | 0.667        | 0.314        | 0.010        | 0.008        | 7.982         | 0.813        | 92.982        |
| Taiwan                               | TW   | 24         | 19         | 0.971        | 0.024        | 0.030        | 0.016        | 22.764        | 4.172        | 94.432        |
| Palau                                | PL   | 29         | 15         | 0.872        | 0.053        | 0.011        | 0.006        | 2.369         | 0.000        | 12.447        |
| Philippines                          | PH   | 38         | 20         | 0.918        | 0.026        | 0.026        | 0.013        | 21.480        | 7.385        | 28.363        |
| +Palawan, Philippines                | PW   | 17         | 9          | 0.846        | 0.070        | 0.015        | 0.008        | 9.908         | 1.164        | 15.756        |
| +Cebu, Philippines                   | PC   | 21         | 14         | 0.895        | 0.061        | 0.018        | 0.010        | 1.943         | 0.000        | 18.604        |
| Western Australia                    | WA   | 129        | 69         | 0.964        | 0.010        | 0.024        | 0.012        | 12.533        | 2.637        | 16.803        |
| +Scott Reef, Western Australia       | SR   | 87         | 47         | 0.939        | 0.019        | 0.015        | 0.008        | 10.344        | 1.938        | 14.924        |
| +Abrolhos Islands, Western Australia | AR   | 42         | 23         | 0.940        | 0.022        | 0.031        | 0.016        | 14.305        | 9.254        | 17.678        |
| <b>ALL</b>                           |      | <b>340</b> | <b>183</b> | <b>0.984</b> | <b>0.003</b> | <b>0.131</b> | <b>0.063</b> | <b>26.133</b> | <b>8.443</b> | <b>30.484</b> |

N: number of individuals analysed; Na: number of haplotypes; h: haplotype diversity,  $\pi$ : nucleotide diversity;  $\tau$  2.5% and 97.5%: 95% CI of Tau.

\* Eastern and Western Group based on control region minimum spanning network analysis.

^Two of the Indonesian populations have small sample sizes and are excluded from SAMOVA.

Table S5. Basic information of microsatellite loci used in this study.

| Loci                          | F <sub>ST</sub> not using ENA | F <sub>ST</sub> using ENA | Null allele <sup>^</sup>   | Forward primer (5'-3')     | Reverse primer (5'-3')       | Repeats | Reference |
|-------------------------------|-------------------------------|---------------------------|----------------------------|----------------------------|------------------------------|---------|-----------|
| <b><i>E. polyphkadion</i></b> |                               |                           |                            |                            |                              |         |           |
| EP11                          | 0.230                         | 0.230                     |                            | AGGGAACACAGGCGTATGG        | TGACCCAGTCAACCTGCAC          | GAT     | 1         |
| EP28                          | 0.321                         | 0.320                     |                            | GACGTTTCAAATGGCGATGC       | ACACACAGTGATTATGCTTGG        | GT      | 1         |
| Ep25                          | 0.141                         | 0.141                     | FJ, NC, PH, PL, TM, CK     | AGCACTTTGTGGTTTCTACCTG     | TGTGCCCAAGATGAATTTCCC        | ACTT    | 1         |
| EP33                          | 0.055                         | 0.053                     | ML, NC, PH, PL, PO         | TCTGTGGGAGCTTAAGACCG       | AGGAACTGTGTCCAGTAGCG         | AC      | 1         |
| EP09                          | 0.015                         | 0.013                     |                            | CCGACATCAACTACCTTTCCG      | TCTGTGTCACGCCGACC            | CTGT    | 1         |
| EP14                          | 0.097                         | 0.090                     | NC, PH                     | TGCAGGTAGAACTCAGGGC        | TGCCGCTAGATCACAGCTC          | ATC     | 1         |
| EP35                          | 0.051                         | 0.050                     | FJ, PH                     | GCTCAAAGTCACGTGCCAG        | AAACCACCATGTTGCGATG          | AGAT    | 1         |
| EP34                          | 0.035                         | 0.035                     | NC                         | CTGCCAACCATTTCAAAAGC       | GGTGTGGTGTTCCTTCCAC          | ATCT    | 1         |
| EP02                          | 0.268                         | 0.269                     |                            | ACCTCAGGAAGAGCAACTG        | CAAAGAGGAGATCGGCATCG         | ACAG    | 1         |
| EP21                          | 0.152                         | 0.152                     | PH                         | CCACCATCTCTTTGAACCGTG      | GCCGACCTTGGACGTTAATC         | CT      | 1         |
| EP20                          | 0.140                         | 0.151                     | NC, PL, PO, TM, CK         | ACTTGGACTCAGGTTTCCC        | GCAGTCCACATGACTACCG          | AC      | 1         |
| <b>All Loci</b>               | <b>0.121</b>                  | <b>0.122</b>              |                            |                            |                              |         |           |
| <b>Bootstrap 95%CI</b>        | <b>0.078-0.174</b>            | <b>0.077-0.175</b>        |                            |                            |                              |         |           |
| <b><i>P. areolatus</i></b>    |                               |                           |                            |                            |                              |         |           |
| Pm5                           | 0.215                         | 0.208                     | ML, PH, PL, SR             | TCAAGGGACACAGAAATGGTTCA    | CCTGCGCTGACCCTGTTTTA         | CA      | 2         |
| Pm3                           | 0.123                         | 0.118                     | ML, CK                     | AGCTGCATAAGCACTTACCGTCACTG | CACGACCCCAAGAGCAAACAC        | CA      | 2         |
| PaD2                          | 0.358                         | 0.354                     |                            | CTCAGCACAATGGGTGGTTA       | CTCAGCACAATGGGTGGTTA         | TAGA    | 3         |
| Pb111                         | 0.251                         | 0.247                     |                            | GTCAGTGTCCCGGTTTGTCT       | GAGGTTTCACCGGAAGAACA         | TTG     | 3         |
| Pb120                         | 0.224                         | 0.223                     |                            | AGAAGAAGTTGGCCATGACG       | TGTGTGTAAGACCCACAGGAA        | CAA     | 3         |
| Pa114                         | 0.164                         | 0.164                     |                            | ATCCTCCTCCCGTAACAAC        | GTTTGTCTGCCGGTGAATTT         | TG, GA  | 3         |
| Pa117                         | 0.204                         | 0.204                     |                            | ATATCCGCCCTGTTTACATC       | GTAATGGCCCTGCTTTGTGT         | CA      | 3         |
| Pm6                           | 0.116                         | 0.112                     | CK                         | AGCTACTGTCCGCTCTGTTAATGCTA | AACAGGATGCTGAAATAGAATTTGG    | CA      | 2         |
| Pma038                        | 0.229                         | 0.223                     | FJ, TS                     | TATGGAGGGATGATGCTATCTAAGAG | ATGCTAAACTGGATGACTACAATC     | AGAT    | 4         |
| <b>All Loci</b>               | <b>0.204</b>                  | <b>0.201</b>              |                            |                            |                              |         |           |
| <b>Bootstrap 95%CI</b>        | <b>0.164-0.249</b>            | <b>0.161-0.246</b>        |                            |                            |                              |         |           |
| <b><i>P. leopardus</i></b>    |                               |                           |                            |                            |                              |         |           |
| Pma101                        | 0.120                         | 0.120                     |                            | TGTTCTGTGATATGTAATGTGCTG   | GGGGATAGACAAGAGGAAAGAGAGGGGA | TATC    | 4         |
| Pma109                        | 0.234                         | 0.246                     | LI                         | TGCCGACTCGATTTGTAACAGTGC   | ACTCAGATATCTTGAGGTTAGAGGTC   | ATCT    | 4         |
| Pma106                        | 0.099                         | 0.087                     | SR, AR, PL, PH, TW, LI, FJ | CAGGAGCCATTGAGACAGGGAGAGG  | AGTGTGGTGGTTTCGCTGATGCTT     | GATA    | 4         |
| Ple002                        | 0.088                         | 0.079                     | PH, LI                     | TACTCGCAATTATAACACAGATCCAG | TTTGTCCAGCACTGTATTTATCTATC   | AGAT    | 4         |
| Pma090                        | 0.209                         | 0.202                     | FJ                         | GATGTCCAAATATCACCTTAACCAG  | AGAGGCTCAATATTATCATGTGAACG   | TAGA    | 4         |
| Pma112                        | 0.105                         | 0.091                     | SR, AR, PL, PH, LI, NC, FJ | CTGCACTTAATACCCATGAAATAGC  | TGGAAACCAGTTAAATAATCCCTGAC   | TATC    | 4         |
| Pm3                           | 0.101                         | 0.094                     | SR, AR, PH, TW, FJ         | AGCTGCATAAGCACTTACCGTCACTG | CACGACCCCAAGAGCAAACAC        | CA      | 2         |
| Pma022                        | 0.229                         | 0.231                     | SR, AR, TW                 | AAGATGTGCACTGTCAATACACTATG | GATGTGATATCAGGCTCCTAAATG     | AGAT    | 4         |
| Ple005                        | 0.106                         | 0.101                     | SR, AR, PL, PH, TW         | AACTACAATGAAACCTGCTCTTATG  | TTTGATTATGACTCAATGATCGCAAG   | ACAG    | 4         |
| <b>All Loci</b>               | <b>0.140</b>                  | <b>0.135</b>              |                            |                            |                              |         |           |
| <b>Bootstrap 95%CI</b>        | <b>0.109-0.180</b>            | <b>0.100-0.179</b>        |                            |                            |                              |         |           |

^ Populations with null alleles detected by MICROCHECKER

- 1 Ma KY, de Mitcheson YS, Chu KH. Isolation and characterization of microsatellite markers from the camouflage grouper, *Epinephelus polyphkadion* (Epinephelidae). *Conserv Genet Resour.* 2013; 5:1129-1132.
- 2 Zhu ZY, Lo LC, Lin G, Xu YX, Yue GH. Isolation and characterization of polymorphic microsatellites from red coral grouper (*Plectropomus maculatus*). *Mol Ecol Resour.* 2005;5:579-581.
- 3 Almany GR, Hamilton RJ, Bode M, Matawai M, Potuku T, Saenz-Agudelo P, Plane, S, Berumen ML, Rhodes KL, Thorrold SR, Russ GR. Dispersal of grouper larvae drives local resource sharing in a coral reef fishery. *Curr Biol.* 2013;23:626-630.
- 4 Harrison HB, Feldheim KA, Jones GP, Ma K, Mansour H, Perumal S, Williamson DH, Berumen, ML. Validation of microsatellite multiplexes for parentage analysis and species discrimination in two hybridizing species of coral reef fish (*Plectropomus* spp., Serranidae). *Ecol Evol.* 2014;4:2046-2057.

Table S6. *Epinephelus polyphekadion* basic genetic diversity statistics based on 11 microsatellite loci.

| Loci                               |      |                | EP11 |       |       |       | EP25 |       |       |       | EP09 |       |       |       | EP35 |       |       |       | EP02 |       |       |       | EP20 |       |       |       |
|------------------------------------|------|----------------|------|-------|-------|-------|------|-------|-------|-------|------|-------|-------|-------|------|-------|-------|-------|------|-------|-------|-------|------|-------|-------|-------|
| Sampling sites                     | Code | N              | Na   | Ho    | He    | adjP  | Na   | Ho    | He    | adjP  | Na   | Ho    | He    | adjP  | Na   | Ho    | He    | adjP  | Na   | Ho    | He    | adjP  | Na   | Ho    | He    | adjP  |
| Pacific Ocean + Eastern IO         | PAC  | 221            | -    | -     | -     | -     | -    | -     | -     | -     | -    | -     | -     | -     | -    | -     | -     | -     | -    | -     | -     | -     | -    | -     | -     | -     |
| French Polynesia                   | TM   | 17             | 2    | 0.118 | 0.111 | 1.000 | 5    | 0.294 | 0.728 | 0.000 | 3    | 0.647 | 0.455 | 1.000 | 11   | 0.647 | 0.730 | 0.285 | 2    | 0.059 | 0.057 | 1.000 | 5    | 0.471 | 0.740 | 0.003 |
| Fiji                               | FJ   | 33             | 1    | 0.000 | 0.000 | 1.000 | 7    | 0.394 | 0.778 | 0.000 | 4    | 0.515 | 0.424 | 1.000 | 15   | 0.577 | 0.887 | 0.000 | 5    | 0.333 | 0.296 | 1.000 | 6    | 0.606 | 0.680 | 0.136 |
| New Caledonia                      | NC   | 30             | 2    | 0.200 | 0.180 | 1.000 | 8    | 0.667 | 0.799 | 0.009 | 4    | 0.467 | 0.410 | 1.000 | 11   | 0.731 | 0.836 | 0.028 | 5    | 0.433 | 0.542 | 0.360 | 6    | 0.552 | 0.764 | 0.013 |
| Pohnpei                            | PO   | 25             | 2    | 0.040 | 0.039 | 1.000 | 6    | 0.560 | 0.723 | 0.047 | 4    | 0.240 | 0.220 | 1.000 | 16   | 0.875 | 0.909 | 0.094 | 5    | 0.708 | 0.584 | 1.000 | 6    | 0.560 | 0.755 | 0.015 |
| Palau                              | PL   | 39             | 3    | 0.316 | 0.278 | 1.000 | 8    | 0.333 | 0.762 | 0.000 | 4    | 0.231 | 0.255 | 0.100 | 14   | 0.838 | 0.876 | 0.285 | 3    | 0.667 | 0.534 | 1.000 | 7    | 0.538 | 0.789 | 0.000 |
| Philippines                        | PH   | 22             | 1    | 0.000 | 0.000 | 1.000 | 5    | 0.476 | 0.686 | 0.031 | 3    | 0.182 | 0.244 | 0.100 | 13   | 0.550 | 0.894 | 0.000 | 2    | 0.500 | 0.455 | 1.000 | 5    | 0.650 | 0.685 | 0.236 |
| +Cebu, Philippines                 | PC   | 17             | -    | -     | -     | -     | -    | -     | -     | -     | -    | -     | -     | -     | -    | -     | -     | -     | -    | -     | -     | -     | -    | -     | -     | -     |
| +Palawan, Philippines <sup>^</sup> | PW   | 5 <sup>^</sup> | -    | -     | -     | -     | -    | -     | -     | -     | -    | -     | -     | -     | -    | -     | -     | -     | -    | -     | -     | -     | -    | -     | -     | -     |
| Scott Reef, Western Australia      | WA   | 16             | 3    | 0.125 | 0.119 | 1.000 | 6    | 0.563 | 0.752 | 0.031 | 4    | 0.375 | 0.326 | 1.000 | 3    | 0.000 | 0.625 | 0.054 | 4    | 0.467 | 0.589 | 0.893 | 7    | 0.667 | 0.762 | 0.034 |
| Cocos (Keeling) Islands            | CK   | 39             | 3    | 0.256 | 0.231 | 1.000 | 8    | 0.583 | 0.728 | 0.031 | 4    | 0.250 | 0.271 | 0.713 | 11   | 0.813 | 0.803 | 0.179 | 5    | 0.737 | 0.558 | 1.000 | 8    | 0.605 | 0.810 | 0.006 |
| Indian Ocean                       | IO   | 40             | -    | -     | -     | -     | -    | -     | -     | -     | -    | -     | -     | -     | -    | -     | -     | -     | -    | -     | -     | -     | -    | -     | -     | -     |
| Maldives                           | ML   | 40             | 5    | 0.692 | 0.537 | 1.000 | 6    | 0.575 | 0.478 | 0.995 | 5    | 0.375 | 0.399 | 0.509 | 14   | 0.828 | 0.885 | 0.028 | 2    | 0.175 | 0.160 | 1.000 | 3    | 0.075 | 0.073 | 1.000 |
| Loci                               |      |                | EP28 |       |       |       | EP33 |       |       |       | EP14 |       |       |       | EP34 |       |       |       | EP21 |       |       |       |      |       |       |       |
| Sampling sites                     | Code | N              | Na   | Ho    | He    | adjP  | Na   | Ho    | He    | adjP  | Na   | Ho    | He    | adjP  | Na   | Ho    | He    | adjP  | Na   | Ho    | He    | adjP  | Na   | Ho    | He    | adjP  |
| Pacific Ocean + Eastern IO         | PAC  | 221            | -    | -     | -     | -     | -    | -     | -     | -     | -    | -     | -     | -     | -    | -     | -     | -     | -    | -     | -     | -     | -    | -     | -     | -     |
| French Polynesia                   | TM   | 17             | 2    | 0.059 | 0.057 | 1.000 | 6    | 0.824 | 0.766 | 0.419 | 4    | 0.588 | 0.678 | 0.214 | 9    | 0.765 | 0.742 | 0.899 | 4    | 0.529 | 0.528 | 0.722 |      |       |       |       |
| Fiji                               | FJ   | 33             | 3    | 0.212 | 0.195 | 1.000 | 15   | 0.758 | 0.810 | 0.146 | 6    | 0.742 | 0.696 | 0.791 | 11   | 0.806 | 0.868 | 0.000 | 8    | 0.467 | 0.552 | 0.499 |      |       |       |       |
| New Caledonia                      | NC   | 30             | 4    | 0.207 | 0.191 | 1.000 | 12   | 0.577 | 0.848 | 0.005 | 7    | 0.538 | 0.727 | 0.114 | 12   | 0.655 | 0.846 | 0.071 | 4    | 0.533 | 0.529 | 0.347 |      |       |       |       |
| Pohnpei                            | PO   | 25             | 4    | 0.280 | 0.314 | 1.000 | 11   | 0.583 | 0.864 | 0.001 | 6    | 0.667 | 0.699 | 0.499 | 10   | 0.760 | 0.827 | 0.181 | 4    | 0.684 | 0.633 | 0.843 |      |       |       |       |
| Palau                              | PL   | 39             | 3    | 0.211 | 0.194 | 1.000 | 11   | 0.429 | 0.777 | 0.000 | 7    | 0.667 | 0.725 | 0.114 | 11   | 0.829 | 0.888 | 0.181 | 5    | 0.564 | 0.503 | 0.848 |      |       |       |       |
| Philippines                        | PH   | 22             | 2    | 0.091 | 0.087 | 1.000 | 12   | 0.474 | 0.868 | 0.000 | 5    | 0.313 | 0.664 | 0.032 | 12   | 0.895 | 0.863 | 0.899 | 4    | 0.278 | 0.551 | 0.031 |      |       |       |       |
| +Cebu, Philippines                 | PC   | 17             | -    | -     | -     | -     | -    | -     | -     | -     | -    | -     | -     | -     | -    | -     | -     | -     | -    | -     | -     | -     | -    | -     | -     | -     |
| +Palawan, Philippines <sup>^</sup> | PW   | 5 <sup>^</sup> | -    | -     | -     | -     | -    | -     | -     | -     | -    | -     | -     | -     | -    | -     | -     | -     | -    | -     | -     | -     | -    | -     | -     | -     |
| Scott Reef, Western Australia      | WA   | 16             | 1    | 0.000 | 0.000 | 1.000 | 10   | 0.714 | 0.855 | 0.054 | 7    | 0.833 | 0.774 | 0.841 | 9    | 0.938 | 0.871 | 0.899 | 4    | 0.462 | 0.476 | 0.722 |      |       |       |       |
| Cocos (Keeling) Islands            | CK   | 39             | 2    | 0.108 | 0.102 | 1.000 | 9    | 0.741 | 0.776 | 0.299 | 8    | 0.769 | 0.778 | 0.160 | 12   | 0.895 | 0.877 | 0.468 | 6    | 0.538 | 0.700 | 0.329 |      |       |       |       |
| Indian Ocean                       | IO   | 40             | -    | -     | -     | -     | -    | -     | -     | -     | -    | -     | -     | -     | -    | -     | -     | -     | -    | -     | -     | -     | -    | -     | -     | -     |
| Maldives                           | ML   | 40             | 10   | 0.641 | 0.696 | 1.000 | 9    | 0.333 | 0.535 | 0.004 | 7    | 0.825 | 0.678 | 0.992 | 10   | 0.914 | 0.841 | 0.899 | 2    | 0.475 | 0.447 | 0.843 |      |       |       |       |

N: number of individuals analysed; Na: mean number of alleles; He: expected heterozygosity; Ho: observed heterozygosity; yellow highlighted adjP: p-value of HWE test adjusted by Benjamini–Hochberg procedure < 0.01.

<sup>^</sup>Two Philippines populations have small sample sizes and both populations were pooled for all subsequent analyses.

Table S7. *Plectropomus areolatus* basic genetic diversity statistics based on 9 microsatellite loci.

| Loci                              | Code | N   | Pm5 |       |       |       | PaD2 |       |       |       | Pb120 |       |       |       | Pa117 |       |       |       | Pma038 |       |       |       |
|-----------------------------------|------|-----|-----|-------|-------|-------|------|-------|-------|-------|-------|-------|-------|-------|-------|-------|-------|-------|--------|-------|-------|-------|
|                                   |      |     | Na  | Ho    | He    | adjP  | Na   | Ho    | He    | adjP  | Na    | Ho    | He    | adjP  | Na    | Ho    | He    | adjP  | Na     | Ho    | He    | adjP  |
| Pacific Ocean + Western Australia | PAC  | 227 | -   | -     | -     | -     | -    | -     | -     | -     | -     | -     | -     | -     | -     | -     | -     | -     | -      | -     | -     | -     |
| Fiji                              | FJ   | 28  | 8   | 0.609 | 0.749 | 0.036 | 3    | 0.250 | 0.223 | 1.000 | 6     | 0.571 | 0.527 | 1.000 | 5     | 0.500 | 0.543 | 1.000 | 3      | 0.321 | 0.469 | 0.154 |
| Solomon Islands                   | SI   | 30  | 6   | 0.867 | 0.688 | 0.997 | 4    | 0.367 | 0.396 | 0.936 | 5     | 0.500 | 0.407 | 1.000 | 4     | 0.567 | 0.536 | 1.000 | 3      | 0.567 | 0.535 | 0.821 |
| Torres Strait                     | TS   | 27  | 8   | 0.741 | 0.804 | 0.219 | 3    | 0.296 | 0.426 | 0.670 | 5     | 0.500 | 0.498 | 1.000 | 2     | 0.556 | 0.431 | 1.000 | 5      | 0.423 | 0.697 | 0.001 |
| Pohnpei                           | PO   | 42  | 9   | 0.667 | 0.720 | 0.694 | 5    | 0.238 | 0.253 | 0.936 | 5     | 0.714 | 0.614 | 1.000 | 6     | 0.667 | 0.576 | 1.000 | 8      | 0.619 | 0.615 | 0.154 |
| Palau                             | PL   | 19  | 7   | 0.474 | 0.733 | 0.006 | 3    | 0.316 | 0.373 | 0.936 | 4     | 0.579 | 0.528 | 1.000 | 5     | 0.526 | 0.496 | 1.000 | 7      | 0.313 | 0.467 | 0.160 |
| Philippines (Cebu)                | PC   | 35  | 6   | 0.571 | 0.711 | 0.157 | 3    | 0.294 | 0.397 | 0.670 | 5     | 0.600 | 0.613 | 0.961 | 4     | 0.486 | 0.436 | 1.000 | 6      | 0.636 | 0.578 | 0.489 |
| East Indonesia^                   | EI   | 10^ | 6   | 0.700 | 0.780 | 0.504 | 3    | 0.500 | 0.485 | 1.000 | 3     | 0.800 | 0.535 | 1.000 | 3     | 0.800 | 0.535 | 1.000 | 3      | 0.600 | 0.565 | 0.821 |
| Western Australia                 | WA   | 36  | -   | -     | -     | -     | -    | -     | -     | -     | -     | -     | -     | -     | -     | -     | -     | -     | -      | -     | -     | -     |
| +Scott Reef, Western Australia    | SR   | 13  | 5   | 0.308 | 0.583 | 0.006 | 3    | 0.385 | 0.476 | 0.936 | 7     | 0.615 | 0.607 | 1.000 | 6     | 0.692 | 0.589 | 1.000 | 4      | 0.385 | 0.331 | 1.000 |
| +Rowley Shoals, Western Australia | CR   | 23  | 6   | 0.609 | 0.542 | 0.997 | 4    | 0.739 | 0.518 | 1.000 | 6     | 0.826 | 0.573 | 1.000 | 6     | 0.636 | 0.490 | 1.000 | 6      | 0.571 | 0.574 | 0.821 |
| Indian Ocean                      | IO   | 67  | -   | -     | -     | -     | -    | -     | -     | -     | -     | -     | -     | -     | -     | -     | -     | -     | -      | -     | -     | -     |
| Cocos (Keeling) Islands           | CK   | 55  | 10  | 0.691 | 0.640 | 0.883 | 3    | 0.519 | 0.401 | 1.000 | 5     | 0.778 | 0.655 | 1.000 | 9     | 0.909 | 0.759 | 1.000 | 7      | 0.545 | 0.562 | 0.592 |
| Maldives                          | ML   | 12  | 2   | 0.000 | 0.444 | 0.006 | 1    | 0.000 | 0.000 | 1.000 | 1     | 0.000 | 0.000 | 1.000 | 3     | 1.000 | 0.538 | 1.000 | 5      | 0.917 | 0.747 | 0.993 |
| Red Sea                           | RS   | 103 | -   | -     | -     | -     | -    | -     | -     | -     | -     | -     | -     | -     | -     | -     | -     | -     | -      | -     | -     | -     |
| Jizan, Red Sea                    | JI   | 27  | 4   | 0.556 | 0.615 | 0.587 | 4    | 0.615 | 0.501 | 1.000 | 7     | 0.704 | 0.737 | 1.000 | 14    | 0.654 | 0.749 | 0.445 | 11     | 0.917 | 0.834 | 1.000 |
| Thuwal, Red Sea                   | TU   | 37  | 3   | 0.649 | 0.493 | 0.997 | 3    | 0.622 | 0.520 | 1.000 | 6     | 0.703 | 0.702 | 0.339 | 14    | 0.848 | 0.832 | 1.000 | 11     | 0.811 | 0.866 | 0.273 |
| Umluj, Red Sea                    | UM   | 39  | 4   | 0.462 | 0.504 | 0.504 | 3    | 0.590 | 0.489 | 1.000 | 6     | 0.795 | 0.726 | 1.000 | 14    | 0.763 | 0.783 | 0.056 | 11     | 0.897 | 0.844 | 0.821 |

  

| Loci                              | Code | N   | Pm3 |       |       |       | Pb111 |       |       |       | Pa114 |       |       |       | Pm6 |       |       |       |
|-----------------------------------|------|-----|-----|-------|-------|-------|-------|-------|-------|-------|-------|-------|-------|-------|-----|-------|-------|-------|
|                                   |      |     | Na  | Ho    | He    | adjP  | Na    | Ho    | He    | adjP  | Na    | Ho    | He    | adjP  | Na  | Ho    | He    | adjP  |
| Pacific Ocean + Western Australia | PAC  | 227 | -   | -     | -     | -     | -     | -     | -     | -     | -     | -     | -     | -     | -   | -     | -     | -     |
| Fiji                              | FJ   | 28  | 8   | 0.607 | 0.652 | 0.586 | 8     | 0.714 | 0.663 | 0.963 | 6     | 0.607 | 0.619 | 0.885 | 11  | 0.857 | 0.867 | 0.537 |
| Solomon Islands                   | SI   | 30  | 8   | 0.600 | 0.648 | 0.475 | 7     | 0.700 | 0.656 | 0.827 | 7     | 0.767 | 0.729 | 0.885 | 13  | 1.000 | 0.878 | 1.000 |
| Torres Strait                     | TS   | 27  | 7   | 0.846 | 0.708 | 0.913 | 5     | 0.667 | 0.594 | 0.963 | 6     | 0.852 | 0.749 | 0.885 | 14  | 1.000 | 0.813 | 1.000 |
| Pohnpei                           | PO   | 42  | 8   | 0.833 | 0.715 | 0.981 | 11    | 0.690 | 0.694 | 0.117 | 10    | 0.857 | 0.784 | 0.885 | 17  | 0.976 | 0.849 | 1.000 |
| Palau                             | PL   | 19  | 9   | 0.684 | 0.752 | 0.170 | 11    | 0.684 | 0.751 | 0.596 | 5     | 0.632 | 0.661 | 0.885 | 14  | 0.895 | 0.898 | 0.682 |
| Philippines (Cebu)                | PC   | 35  | 7   | 0.600 | 0.621 | 0.662 | 8     | 0.743 | 0.676 | 0.963 | 10    | 0.829 | 0.789 | 0.885 | 13  | 1.000 | 0.827 | 1.000 |
| East Indonesia^                   | EI   | 10^ | 7   | 0.700 | 0.760 | 0.586 | 3     | 0.600 | 0.545 | 0.963 | 5     | 0.700 | 0.640 | 0.885 | 8   | 0.800 | 0.805 | 0.883 |
| Western Australia                 | WA   | 36  | -   | -     | -     | -     | -     | -     | -     | -     | -     | -     | -     | -     | -   | -     | -     | -     |
| +Scott Reef, Western Australia    | SR   | 13  | 8   | 0.846 | 0.778 | 0.576 | 6     | 0.417 | 0.590 | 0.271 | 5     | 0.846 | 0.757 | 0.885 | 9   | 0.769 | 0.787 | 0.682 |
| +Rowley Shoals, Western Australia | CR   | 23  | 9   | 0.727 | 0.697 | 0.283 | 10    | 0.826 | 0.793 | 0.827 | 4     | 0.783 | 0.680 | 0.885 | 10  | 0.952 | 0.771 | 1.000 |
| Indian Ocean                      | IO   | 67  | -   | -     | -     | -     | -     | -     | -     | -     | -     | -     | -     | -     | -   | -     | -     | -     |
| Cocos (Keeling) Islands           | CK   | 55  | 7   | 0.500 | 0.665 | 0.000 | 10    | 0.574 | 0.532 | 0.341 | 6     | 0.722 | 0.688 | 0.885 | 11  | 0.712 | 0.827 | 0.000 |
| Maldives                          | ML   | 12  | 8   | 0.417 | 0.733 | 0.008 | 1     | 0.000 | 0.000 | 1.000 | 6     | 0.917 | 0.778 | 0.885 | 8   | 0.917 | 0.816 | 1.000 |
| Red Sea                           | RS   | 103 | -   | -     | -     | -     | -     | -     | -     | -     | -     | -     | -     | -     | -   | -     | -     | -     |
| Jizan, Red Sea                    | JI   | 27  | 9   | 0.704 | 0.762 | 0.283 | 4     | 0.577 | 0.672 | 0.243 | 8     | 0.667 | 0.636 | 0.885 | 6   | 0.519 | 0.536 | 0.320 |
| Thuwal, Red Sea                   | TU   | 37  | 9   | 0.757 | 0.763 | 0.283 | 5     | 0.556 | 0.581 | 0.006 | 7     | 0.657 | 0.612 | 0.885 | 14  | 0.703 | 0.762 | 0.450 |
| Umluj, Red Sea                    | UM   | 39  | 9   | 0.795 | 0.783 | 0.576 | 4     | 0.769 | 0.568 | 1.000 | 5     | 0.579 | 0.574 | 0.885 | 8   | 0.676 | 0.744 | 0.230 |

N: number of individuals analysed; Na: mean number of alleles; He: expected heterozygosity; Ho: observed heterozygosity; yellow highlighted adjP: p-value of HWE test adjusted by Benjamini–Hochberg procedure < 0.01.

^The East Indonesia population has a small sample size and was excluded from DAPC, STRUCTURE and SAMOVA analyses.

Table S8. *Plectropomus leopardus* basic genetic diversity statistics based on 9 microsatellite loci.

| Loci                  |      |                 | Pma101 |       |       |       | Pma106 |       |       |       | Pma090 |       |       |       | Pm3    |       |       |       | Ple005 |       |       |       |
|-----------------------|------|-----------------|--------|-------|-------|-------|--------|-------|-------|-------|--------|-------|-------|-------|--------|-------|-------|-------|--------|-------|-------|-------|
| Sampling sites        | Code | N               | Na     | Ho    | He    | adjP  | Na     | Ho    | He    | adjP  | Na     | Ho    | He    | adjP  | Na     | Ho    | He    | adjP  | Na     | Ho    | He    | adjP  |
| <b>East</b>           | EAS  | 195             | -      | -     | -     | -     | -      | -     | -     | -     | -      | -     | -     | -     | -      | -     | -     | -     | -      | -     | -     | -     |
| Fiji                  | FJ   | 20              | 6      | 0.600 | 0.545 | 1.000 | 8      | 0.313 | 0.756 | 0.001 | 6      | 0.588 | 0.782 | 0.023 | 8      | 0.316 | 0.740 | 0.000 | 8      | 0.583 | 0.778 | 0.155 |
| New Caledonia         | NC   | 37              | 4      | 0.667 | 0.579 | 1.000 | 9      | 0.714 | 0.787 | 0.097 | 2      | 0.429 | 0.396 | 0.868 | 7      | 0.826 | 0.819 | 0.427 | 11     | 0.778 | 0.800 | 0.524 |
| Great Barrier Reef    | GBR  | 138             | -      | -     | -     | -     | -      | -     | -     | -     | -      | -     | -     | -     | -      | -     | -     | -     | -      | -     | -     | -     |
| +Hick's Reef          | HR   | 18              | 5      | 0.611 | 0.543 | 1.000 | 12     | 0.765 | 0.830 | 0.124 | 3      | 0.667 | 0.563 | 0.302 | 7      | 0.917 | 0.795 | 0.730 | 7      | 0.733 | 0.760 | 0.220 |
| +Lizard Island        | LI   | 47              | 6      | 0.778 | 0.743 | 1.000 | 17     | 0.727 | 0.897 | 0.004 | 4      | 0.511 | 0.472 | 0.868 | 7      | 0.860 | 0.811 | 0.730 | 10     | 0.787 | 0.793 | 0.524 |
| +Townsville           | TV   | 35              | 7      | 0.742 | 0.660 | 1.000 | 13     | 0.407 | 0.873 | 0.000 | 4      | 0.303 | 0.391 | 0.036 | 7      | 0.774 | 0.780 | 0.427 | 9      | 0.706 | 0.805 | 0.013 |
| +Swains Reef          | SW   | 38              | 6      | 0.621 | 0.747 | 0.243 | 17     | 0.611 | 0.913 | 0.000 | 3      | 0.471 | 0.381 | 1.000 | 8      | 0.861 | 0.716 | 0.914 | 8      | 0.929 | 0.804 | 0.931 |
| <b>West</b>           | WES  | 170             | -      | -     | -     | -     | -      | -     | -     | -     | -      | -     | -     | -     | -      | -     | -     | -     | -      | -     | -     | -     |
| Palau                 | PL   | 31              | 8      | 0.484 | 0.601 | 0.097 | 12     | 0.500 | 0.791 | 0.000 | 4      | 0.467 | 0.592 | 0.302 | 8      | 0.588 | 0.721 | 0.138 | 8      | 0.333 | 0.791 | 0.000 |
| Taiwan                | TW   | 39              | 6      | 0.590 | 0.627 | 0.243 | 8      | 0.500 | 0.740 | 0.004 | 5      | 0.500 | 0.587 | 0.413 | 10     | 0.629 | 0.790 | 0.000 | 10     | 0.405 | 0.802 | 0.000 |
| Philippines           | PH   | 36              | -      | -     | -     | -     | -      | -     | -     | -     | -      | -     | -     | -     | -      | -     | -     | -     | -      | -     | -     | -     |
| +Palawan, Philippines | PW   | 19 <sup>^</sup> | 11     | 0.737 | 0.792 | 0.580 | 11     | 0.750 | 0.871 | 0.017 | 6      | 0.765 | 0.661 | 0.868 | 5      | 0.400 | 0.740 | 0.045 | 9      | 0.267 | 0.749 | 0.000 |
| +Cebu, Philippines    | PC   | 17 <sup>^</sup> | 10     | 0.636 | 0.719 | 0.535 | 9      | 0.375 | 0.859 | 0.000 | 6      | 0.647 | 0.728 | 0.464 | 4      | 0.250 | 0.719 | 0.055 | 9      | 0.636 | 0.781 | 0.013 |
| Western Australia     | WA   | 64              | -      | -     | -     | -     | -      | -     | -     | -     | -      | -     | -     | -     | -      | -     | -     | -     | -      | -     | -     | -     |
| +Scott Reef           | SR   | 33              | 3      | 0.061 | 0.059 | 1.000 | 8      | 0.850 | 0.686 | 0.965 | 4      | 0.469 | 0.499 | 0.302 | 9      | 0.364 | 0.802 | 0.000 | 6      | 0.654 | 0.746 | 0.319 |
| +Abrolhos Islands     | AR   | 31              | 7      | 0.387 | 0.342 | 1.000 | 15     | 0.600 | 0.861 | 0.000 | 6      | 0.645 | 0.730 | 0.093 | 10     | 0.636 | 0.693 | 0.053 | 8      | 0.607 | 0.736 | 0.011 |
| Loci                  |      |                 | Pma109 |       |       |       | Ple002 |       |       |       | Pma112 |       |       |       | Pma022 |       |       |       |        |       |       |       |
| Sampling sites        | Code | N               | Na     | Ho    | He    | adjP  | Na     | Ho    | He    | adjP  | Na     | Ho    | He    | adjP  | Na     | Ho    | He    | adjP  | Na     | Ho    | He    | adjP  |
| <b>East</b>           | EAS  | 195             | -      | -     | -     | -     | -      | -     | -     | -     | -      | -     | -     | -     | -      | -     | -     | -     | -      | -     | -     | -     |
| Fiji                  | FJ   | 20              | 12     | 0.818 | 0.901 | 0.164 | 9      | 0.700 | 0.790 | 0.366 | 7      | 0.462 | 0.728 | 0.013 | 9      | 0.667 | 0.836 | 0.086 |        |       |       |       |
| New Caledonia         | NC   | 37              | 6      | 0.692 | 0.683 | 0.642 | 8      | 0.857 | 0.829 | 0.708 | 7      | 0.351 | 0.685 | 0.000 | 2      | 0.054 | 0.053 | 1.000 |        |       |       |       |
| Great Barrier Reef    | GBR  | 138             | -      | -     | -     | -     | -      | -     | -     | -     | -      | -     | -     | -     | -      | -     | -     | -     |        |       |       |       |
| +Hick's Reef          | HR   | 18              | 11     | 0.438 | 0.881 | 0.000 | 8      | 0.889 | 0.796 | 0.834 | 10     | 0.375 | 0.832 | 0.000 | 6      | 0.389 | 0.380 | 0.679 |        |       |       |       |
| +Lizard Island        | LI   | 47              | 15     | 0.500 | 0.895 | 0.000 | 14     | 0.814 | 0.847 | 0.549 | 13     | 0.568 | 0.827 | 0.000 | 10     | 0.587 | 0.594 | 0.270 |        |       |       |       |
| +Townsville           | TV   | 35              | 12     | 0.294 | 0.893 | 0.000 | 14     | 0.879 | 0.877 | 0.680 | 9      | 0.500 | 0.786 | 0.001 | 9      | 0.559 | 0.609 | 0.610 |        |       |       |       |
| +Swains Reef          | SW   | 38              | 9      | 0.417 | 0.858 | 0.000 | 9      | 0.286 | 0.469 | 0.000 | 12     | 0.486 | 0.788 | 0.000 | 4      | 0.162 | 0.177 | 0.371 |        |       |       |       |
| <b>West</b>           | WES  | 170             | -      | -     | -     | -     | -      | -     | -     | -     | -      | -     | -     | -     | -      | -     | -     | -     |        |       |       |       |
| Palau                 | PL   | 31              | 3      | 0.211 | 0.215 | 0.625 | 9      | 0.714 | 0.733 | 0.366 | 7      | 0.641 | 0.788 | 0.028 | 8      | 0.526 | 0.602 | 0.170 |        |       |       |       |
| Taiwan                | TW   | 39              | 8      | 0.300 | 0.352 | 0.167 | 12     | 0.774 | 0.836 | 0.549 | 9      | 0.433 | 0.795 | 0.000 | 12     | 0.839 | 0.862 | 0.122 |        |       |       |       |
| Philippines           | PH   | 36              | -      | -     | -     | -     | -      | -     | -     | -     | -      | -     | -     | -     | -      | -     | -     | -     |        |       |       |       |
| +Palawan, Philippines | PW   | 19 <sup>^</sup> | 5      | 0.474 | 0.428 | 0.966 | 11     | 0.722 | 0.841 | 0.195 | 9      | 0.632 | 0.837 | 0.008 | 11     | 0.842 | 0.859 | 0.153 |        |       |       |       |
| +Cebu, Philippines    | PC   | 17 <sup>^</sup> | 4      | 0.400 | 0.580 | 0.191 | 10     | 0.750 | 0.846 | 0.113 | 8      | 0.750 | 0.779 | 0.080 | 8      | 0.647 | 0.830 | 0.153 |        |       |       |       |
| Western Australia     | WA   | 64              | -      | -     | -     | -     | -      | -     | -     | -     | -      | -     | -     | -     | -      | -     | -     | -     |        |       |       |       |
| +Scott Reef           | SR   | 33              | 4      | 0.667 | 0.512 | 0.973 | 11     | 0.857 | 0.811 | 0.549 | 5      | 0.387 | 0.544 | 0.000 | 8      | 0.667 | 0.764 | 0.170 |        |       |       |       |
| +Abrolhos Islands     | AR   | 31              | 6      | 0.839 | 0.655 | 0.973 | 9      | 0.759 | 0.821 | 0.366 | 9      | 0.552 | 0.818 | 0.000 | 9      | 0.774 | 0.827 | 0.086 |        |       |       |       |

N: number of individuals analysed; Na: mean number of alleles; He: expected heterozygosity; Ho: observed heterozygosity; yellow highlighted adjP: p-value of HWE test adjusted by Benjamini–Hochberg procedure < 0.01.

<sup>^</sup>Two Philippines populations have relatively small sample sizes; they were pooled in STRUCTURE analyses but not the others.



Table S9. Population structure results for the three species examined, based on SAMOVA analyses of control region sequences and microsatellite allelic frequencies respectively. The number of groups (K) identified and corresponding grouped locations within eco-regions, with the highest  $F_{CT}$  for each species based on each dataset shown. IP: Indo-Pacific, CIP: Central Indo-Pacific, EIP: Eastern Indo-Pacific; definition follows Spalding et al. (2007), and WAPO: Western Australia + Pacific Ocean.

| Datasets               | Region  | K  | Grouping                                       | Standard AMOVA |          | Locus by locus AMOVA |          |
|------------------------|---------|----|------------------------------------------------|----------------|----------|----------------------|----------|
|                        |         |    |                                                | $F_{CT}$       | p-value  | $F_{CT}$             | p-value  |
| Control region         |         |    |                                                |                |          |                      |          |
| <i>E. polyphkadion</i> | IP      | 2  | {ML}{CK,CR,SR,PL,PH,PO,NC,FJ,TM}               | 0.852          | 0.105    | 0.852                | <0.0001  |
| <i>E. polyphkadion</i> | CIP+EIP | 2  | {CK,CR,SR,PH,PL,PO,NC,FJ}{TM}                  | 0.219          | 0.123    | 0.218                | <0.0001  |
| <i>E. polyphkadion</i> | CIP     | 6  | {CK}{CR,NC}{SR,PH}{PL}{PO}{FJ}                 | 0.046          | <0.01    | 0.046                | <0.0001  |
| <i>P. areolatus</i>    | IP      | 3  | {UM,TU,JI}{ML,CK}{CR,SR,EI,PL,PC,PO,TS,SI,FJ}  | 0.898          | <0.0001  | 0.898                | <0.0001  |
| <i>P. areolatus</i>    | WAPO    | 8  | {EI}{SI}{CR}{SR}{TS}{PL,PH}{PO}{FJ}            | 0.045          | <0.05    | 0.045                | <0.05    |
| <i>P. leopardus</i>    | CIP     | 9  | {AR}{SR,PL}{EI}{PC,TW}{PW}{TS,CB}{SI}{NC}{FJ}  | 0.879          | <0.0001  | 0.795                | <0.0001  |
| Microsatellite         |         |    |                                                |                |          |                      |          |
| <i>E. polyphkadion</i> | IP      | 2  | {ML}{CK,WA,PL,PH,PO,NC,FJ,TM}                  | 0.265          | 0.129    | 0.197                | <0.0001  |
| <i>E. polyphkadion</i> | CIP+EIP | 2  | {CK,WA,PL,PH,PO,NC,FJ}{TM}                     | 0.066          | 0.129    | 0.038                | <0.05    |
| <i>E. polyphkadion</i> | CIP     | 4  | {CK}{WA,PL,PH,PO}{NC}{FJ}                      | 0.051          | <0.05    | 0.033                | <0.01    |
| <i>P. areolatus</i>    | IP      | 3  | {UM,TU,JI}{ML}{CK,CR,SR,PL,PC,PO,TS,SI,FJ}     | 0.292          | <0.0001  | 0.290                | <0.0001  |
| <i>P. areolatus</i>    | WAPO    | 2  | {CR,SR}{PL,PC,PO,TS,SI,FJ}                     | 0.043          | <0.05    | 0.043                | <0.05    |
| <i>P. leopardus</i>    | CIP     | 10 | {AR}{SR}{PW}{PC}{PL}{TW}{LI,HR,TV}{SW}{NC}{FJ} | 0.250          | < 0.0001 | 0.133                | < 0.0001 |

Spalding MD, Fox HE, Allen GR, Davidson N, Ferdaña ZA, Finlayson M, et al. Marine Ecoregions of the World: A Bioregionalization of Coastal and Shelf Areas. Bioscience. 2007;57:573–83.

Table S10. *Epinephelus polyphekadion* pairwise  $\Phi_{ST}$  values, based on 723 bp control region sequence. Benjamini–Hochberg adjusted  $P < 0.01$ , italics; Benjamini–Hochberg adjusted  $P < 0.001$ , bold and italics.

|                    | French Polynesia    | Fiji                | New Caledonia       | Pohnpei             | Palau               | Philippines         | Okinawa*            | Bangkok*            | Scott Reef          | Rowley Shoals       | Cocos (Keeling) Is  | Phuket* |
|--------------------|---------------------|---------------------|---------------------|---------------------|---------------------|---------------------|---------------------|---------------------|---------------------|---------------------|---------------------|---------|
| Fiji               | <b><i>0.317</i></b> |                     |                     |                     |                     |                     |                     |                     |                     |                     |                     |         |
| New Caledonia      | <b><i>0.315</i></b> | 0.025               |                     |                     |                     |                     |                     |                     |                     |                     |                     |         |
| Pohnpei            | <b><i>0.464</i></b> | <b><i>0.132</i></b> | <b><i>0.066</i></b> |                     |                     |                     |                     |                     |                     |                     |                     |         |
| Palau              | <b><i>0.290</i></b> | <b><i>0.064</i></b> | 0.007               | 0.019               |                     |                     |                     |                     |                     |                     |                     |         |
| Philippines        | <b><i>0.322</i></b> | 0.062               | 0.009               | 0.022               | 0.003               |                     |                     |                     |                     |                     |                     |         |
| Okinawa*           | 0.844*              | 0.045*              | 0.002*              | 0.075*              | -0.047*             | -0.021*             |                     |                     |                     |                     |                     |         |
| Bangkok*           | 0.808*              | 0.027*              | -0.061*             | -0.092*             | -0.108*             | -0.084*             | -0.100*             |                     |                     |                     |                     |         |
| Scott Reef         | <b><i>0.385</i></b> | 0.053               | 0.004               | 0.014               | -0.004              | -0.027              | -0.076*             | -0.104*             |                     |                     |                     |         |
| Rowley Shoals      | <b><i>0.318</i></b> | 0.033               | 0.003               | <b><i>0.116</i></b> | 0.029               | 0.027               | 0.024*              | -0.053*             | 0.008               |                     |                     |         |
| Cocos (Keeling) Is | <b><i>0.310</i></b> | 0.048               | 0.022               | 0.044               | 0.016               | 0.034               | -0.012*             | -0.062*             | 0.023               | 0.058               |                     |         |
| Phuket*            | <b><i>0.975</i></b> | <b><i>0.880</i></b> | <b><i>0.872</i></b> | <b><i>0.863</i></b> | <b><i>0.849</i></b> | <b><i>0.860</i></b> | 0.861*              | <b><i>0.873</i></b> | <b><i>0.850</i></b> | <b><i>0.879</i></b> | <b><i>0.845</i></b> |         |
| Maldives           | <b><i>0.909</i></b> | <b><i>0.866</i></b> | <b><i>0.861</i></b> | <b><i>0.852</i></b> | <b><i>0.844</i></b> | <b><i>0.851</i></b> | <b><i>0.846</i></b> | <b><i>0.851</i></b> | <b><i>0.845</i></b> | <b><i>0.862</i></b> | <b><i>0.842</i></b> | 0.004*  |

\* Population with small sample size

Table S11. *Epinephelus polyphekadion* pairwise  $F_{ST}$  values, based on 11 microsatellite loci. Benjamini–Hochberg adjusted  $P < 0.01$ , italics; Benjamini–Hochberg adjusted  $P < 0.001$ , bold and italics.

|                    | French Polynesia    | Fiji                | New Caledonia       | Pohnpei             | Philippines         | Palau               | Western Australia   | Cocos (Keeling) Is  |
|--------------------|---------------------|---------------------|---------------------|---------------------|---------------------|---------------------|---------------------|---------------------|
| Fiji               | <b><i>0.047</i></b> |                     |                     |                     |                     |                     |                     |                     |
| New Caledonia      | <b><i>0.050</i></b> | <b><i>0.025</i></b> |                     |                     |                     |                     |                     |                     |
| Pohnpei            | <b><i>0.099</i></b> | <b><i>0.047</i></b> | 0.012               |                     |                     |                     |                     |                     |
| Philippines        | <b><i>0.147</i></b> | <b><i>0.092</i></b> | <b><i>0.045</i></b> | <i>0.025</i>        |                     |                     |                     |                     |
| Palau              | <b><i>0.104</i></b> | <b><i>0.056</i></b> | <b><i>0.021</i></b> | <i>0.018</i>        | 0.018               |                     |                     |                     |
| Western Australia  | <i>0.038</i>        | 0.007               | -0.018              | -0.034              | -0.020              | -0.035              |                     |                     |
| Cocos (Keeling) Is | <b><i>0.105</i></b> | <b><i>0.084</i></b> | <b><i>0.049</i></b> | <b><i>0.051</i></b> | <b><i>0.074</i></b> | <b><i>0.058</i></b> | <b><i>0.025</i></b> |                     |
| Maldives           | <b><i>0.341</i></b> | <b><i>0.307</i></b> | <b><i>0.253</i></b> | <b><i>0.245</i></b> | <b><i>0.262</i></b> | <b><i>0.227</i></b> | <b><i>0.253</i></b> | <b><i>0.246</i></b> |

Table S12. *Plectropomus areolatus* pairwise  $\Phi_{ST}$  values, based on 580 bp control region sequences. Benjamini–Hochberg adjusted  $P < 0.01$ , italics; Benjamini–Hochberg adjusted  $P < 0.001$ , bold and italics.

|                    | Fiji                | Solomon Islands     | Torres Strait       | Pohnpei             | Palau               | Philippines         | Borneo* | East Indonesia      | Bali                | Scott Reef          | Rowley Shoals       | Cocos (Keeling) Is  | Maldives            | Jizan, Red Sea | Thuwal, Red Sea |
|--------------------|---------------------|---------------------|---------------------|---------------------|---------------------|---------------------|---------|---------------------|---------------------|---------------------|---------------------|---------------------|---------------------|----------------|-----------------|
| Solomon Islands    | <i>0.118</i>        |                     |                     |                     |                     |                     |         |                     |                     |                     |                     |                     |                     |                |                 |
| Torres Strait      | <i>0.072</i>        | 0.030               |                     |                     |                     |                     |         |                     |                     |                     |                     |                     |                     |                |                 |
| Pohnpei            | 0.025               | 0.026               | 0.049               |                     |                     |                     |         |                     |                     |                     |                     |                     |                     |                |                 |
| Palau              | 0.022               | 0.138               | <i>0.086</i>        | <b><i>0.102</i></b> |                     |                     |         |                     |                     |                     |                     |                     |                     |                |                 |
| Philippines        | 0.024               | 0.045               | 0.033               | 0.048               | -0.010              |                     |         |                     |                     |                     |                     |                     |                     |                |                 |
| Borneo*            | -0.895              | -0.619              | -0.731              | -0.868              | -0.684              | -0.756              |         |                     |                     |                     |                     |                     |                     |                |                 |
| East Indonesia     | 0.019               | 0.014               | 0.007               | -0.019              | 0.065               | 0.015               | -0.837  |                     |                     |                     |                     |                     |                     |                |                 |
| Bali               | 0.023               | 0.025               | -0.043              | 0.037               | -0.023              | -0.046              | -0.920  | -0.011              |                     |                     |                     |                     |                     |                |                 |
| Scott Reef         | 0.037               | 0.010               | 0.011               | -0.002              | 0.094               | 0.035               | -0.922  | -0.009              | 0.022               |                     |                     |                     |                     |                |                 |
| Rowley Shoals      | <b><i>0.106</i></b> | 0.081               | 0.024               | <i>0.064</i>        | <i>0.146</i>        | 0.064               | -0.663  | 0.057               | 0.061               | 0.043               |                     |                     |                     |                |                 |
| Cocos (Keeling) Is | <b><i>0.794</i></b> | <b><i>0.801</i></b> | <b><i>0.766</i></b> | <b><i>0.797</i></b> | <b><i>0.777</i></b> | <b><i>0.760</i></b> | 0.768*  | <b><i>0.779</i></b> | <b><i>0.763</i></b> | <b><i>0.799</i></b> | <b><i>0.789</i></b> |                     |                     |                |                 |
| Maldives           | <b><i>0.810</i></b> | <b><i>0.813</i></b> | <b><i>0.768</i></b> | <b><i>0.810</i></b> | <b><i>0.782</i></b> | <b><i>0.763</i></b> | 0.758*  | <b><i>0.774</i></b> | <b><i>0.750</i></b> | <b><i>0.815</i></b> | <b><i>0.806</i></b> | <b><i>0.161</i></b> |                     |                |                 |
| Jizan, Red Sea     | <b><i>0.958</i></b> | <b><i>0.959</i></b> | <b><i>0.943</i></b> | <b><i>0.954</i></b> | <b><i>0.954</i></b> | <b><i>0.940</i></b> | 0.965*  | <b><i>0.949</i></b> | <b><i>0.953</i></b> | <b><i>0.959</i></b> | <b><i>0.957</i></b> | <b><i>0.944</i></b> | <b><i>0.950</i></b> |                |                 |
| Thuwal, Red Sea    | <b><i>0.940</i></b> | <b><i>0.939</i></b> | <b><i>0.927</i></b> | <b><i>0.939</i></b> | <b><i>0.933</i></b> | <b><i>0.926</i></b> | 0.933*  | <b><i>0.929</i></b> | <b><i>0.926</i></b> | <b><i>0.940</i></b> | <b><i>0.939</i></b> | <b><i>0.933</i></b> | <b><i>0.930</i></b> | -0.004         |                 |
| Umluj, Red Sea     | <b><i>0.943</i></b> | <b><i>0.942</i></b> | <b><i>0.930</i></b> | <b><i>0.941</i></b> | <b><i>0.937</i></b> | <b><i>0.928</i></b> | 0.938*  | <b><i>0.933</i></b> | <b><i>0.930</i></b> | <b><i>0.943</i></b> | <b><i>0.942</i></b> | <b><i>0.935</i></b> | <b><i>0.933</i></b> | 0.004          | 0.001           |

\* Population with small sample size

Table S13. *Plectropomus areolatus* pairwise  $F_{ST}$  values, based on nine microsatellite loci. Benjamini–Hochberg adjusted  $P < 0.01$ , italics; Benjamini–Hochberg adjusted  $P < 0.001$ , bold and italics.

|                    | Fiji         | Solomon Islands | Torres Strait | Pohnpei      | Philippines  | Palau        | Indonesia*   | Scott Reef   | Rowley Shoals | Cocos (Keeling) Is | Maldives     | Jizan, Red Sea | Thuwal, Red Sea |
|--------------------|--------------|-----------------|---------------|--------------|--------------|--------------|--------------|--------------|---------------|--------------------|--------------|----------------|-----------------|
| Solomon Islands    | 0.010        |                 |               |              |              |              |              |              |               |                    |              |                |                 |
| Torres Strait      | <b>0.055</b> | <b>0.040</b>    |               |              |              |              |              |              |               |                    |              |                |                 |
| Pohnpei            | <i>0.014</i> | <i>0.016</i>    | <b>0.046</b>  |              |              |              |              |              |               |                    |              |                |                 |
| Philippines        | <b>0.026</b> | <b>0.023</b>    | <b>0.039</b>  | <b>0.020</b> |              |              |              |              |               |                    |              |                |                 |
| Palau              | 0.003        | 0.013           | 0.023         | 0.013        | 0.008        |              |              |              |               |                    |              |                |                 |
| Indonesia*         | 0.022        | 0.021           | <b>0.060</b>  | 0.011        | <b>0.047</b> | <i>0.036</i> |              |              |               |                    |              |                |                 |
| Scott Reef         | <b>0.049</b> | <b>0.047</b>    | <b>0.065</b>  | <b>0.060</b> | <b>0.048</b> | <b>0.047</b> | 0.029*       |              |               |                    |              |                |                 |
| Rowley Shoals      | <b>0.075</b> | <b>0.066</b>    | <b>0.061</b>  | <b>0.071</b> | <b>0.059</b> | <b>0.053</b> | <b>0.036</b> | 0.002        |               |                    |              |                |                 |
| Cocos (Keeling) Is | <b>0.102</b> | <b>0.099</b>    | <b>0.121</b>  | <b>0.085</b> | <b>0.101</b> | <b>0.096</b> | <b>0.096</b> | <b>0.142</b> | <b>0.153</b>  |                    |              |                |                 |
| Maldives           | <b>0.422</b> | <b>0.387</b>    | <b>0.366</b>  | <b>0.365</b> | <b>0.369</b> | <b>0.378</b> | <b>0.386</b> | <b>0.391</b> | <b>0.374</b>  | <b>0.339</b>       |              |                |                 |
| Jizan, Red Sea     | <b>0.334</b> | <b>0.321</b>    | <b>0.306</b>  | <b>0.306</b> | <b>0.311</b> | <b>0.304</b> | <b>0.300</b> | <b>0.307</b> | <b>0.303</b>  | <b>0.310</b>       | <b>0.372</b> |                |                 |
| Thuwal, Red Sea    | <b>0.333</b> | <b>0.320</b>    | <b>0.300</b>  | <b>0.307</b> | <b>0.311</b> | <b>0.302</b> | <b>0.295</b> | <b>0.302</b> | <b>0.296</b>  | <b>0.308</b>       | <b>0.353</b> | 0.009          |                 |
| Umluj, Red Sea     | <b>0.340</b> | <b>0.329</b>    | <b>0.309</b>  | <b>0.315</b> | <b>0.319</b> | <b>0.311</b> | <b>0.305</b> | <b>0.312</b> | <b>0.305</b>  | <b>0.315</b>       | <b>0.363</b> | 0.006          | -0.005          |

\* Population with small sample size

Table S14. *Plectropomus leopardus* pairwise  $\Phi_{ST}$  values, based on 556 bp control region sequence. Benjamini–Hochberg adjusted  $P < 0.01$ , italics; Benjamini–Hochberg adjusted  $P < 0.001$ , bold and italics.

|                  | Fiji         | New Caledonia | Solomon Islands | Cap. & Bunker | Torres Strait | East Indonesia | Borneo*      | Bali*        | Palau        | Taiwan       | Cebu         | Palawan      | Scott Reef   |
|------------------|--------------|---------------|-----------------|---------------|---------------|----------------|--------------|--------------|--------------|--------------|--------------|--------------|--------------|
| New Caledonia    | <b>0.894</b> |               |                 |               |               |                |              |              |              |              |              |              |              |
| Solomon Islands  | <b>0.938</b> | <b>0.715</b>  |                 |               |               |                |              |              |              |              |              |              |              |
| Cap. Bunker      | <b>0.843</b> | <i>0.172</i>  | <b>0.647</b>    |               |               |                |              |              |              |              |              |              |              |
| Torres Strait    | <b>0.869</b> | <b>0.319</b>  | <b>0.660</b>    | 0.018         |               |                |              |              |              |              |              |              |              |
| East Indonesia   | <b>0.956</b> | <b>0.903</b>  | <b>0.906</b>    | <b>0.889</b>  | <b>0.899</b>  |                |              |              |              |              |              |              |              |
| Borneo*          | <b>0.990</b> | <i>0.922</i>  | <i>0.937</i>    | <b>0.893</b>  | <i>0.909</i>  | 0.065          |              |              |              |              |              |              |              |
| Bali*            | <b>0.994</b> | <i>0.929</i>  | <i>0.947</i>    | <b>0.898</b>  | <i>0.915</i>  | 0.099          | -0.018       |              |              |              |              |              |              |
| Palau            | <b>0.983</b> | <b>0.953</b>  | <b>0.961</b>    | <b>0.939</b>  | <b>0.946</b>  | <b>0.509</b>   | <b>0.805</b> | <b>0.835</b> |              |              |              |              |              |
| Taiwan           | <b>0.962</b> | <b>0.920</b>  | <b>0.924</b>    | <b>0.907</b>  | <b>0.915</b>  | <b>0.246</b>   | -0.022       | <b>0.294</b> | <b>0.729</b> |              |              |              |              |
| Cebu             | <b>0.979</b> | <b>0.941</b>  | <b>0.949</b>    | <b>0.924</b>  | <b>0.933</b>  | <b>0.369</b>   | 0.233        | 0.556        | <b>0.811</b> | 0.015        |              |              |              |
| Palawan          | <b>0.981</b> | <b>0.939</b>  | <b>0.948</b>    | <b>0.920</b>  | <b>0.930</b>  | 0.221          | 0.160        | -0.114       | <b>0.812</b> | <b>0.360</b> | <b>0.535</b> |              |              |
| Scott Reef       | <b>0.963</b> | <b>0.947</b>  | <b>0.949</b>    | <b>0.941</b>  | <b>0.944</b>  | <b>0.480</b>   | <b>0.723</b> | <b>0.746</b> | <b>0.107</b> | <b>0.705</b> | <b>0.754</b> | <b>0.748</b> |              |
| Abrolhos Islands | <b>0.943</b> | <b>0.909</b>  | <b>0.910</b>    | <b>0.901</b>  | <b>0.907</b>  | <b>0.248</b>   | <b>0.460</b> | <b>0.515</b> | <b>0.313</b> | <b>0.497</b> | <b>0.568</b> | <b>0.564</b> | <b>0.281</b> |

\* Population with small sample size

Table S15. *Plectropomus leopardus* pairwise  $F_{ST}$  values based on nine microsatellite loci. Benjamini–Hochberg adjusted  $P < 0.01$ , italics; Benjamini–Hochberg adjusted  $P < 0.001$ , bold and italics.

|                  | Fiji         | New Caledonia | Swain Reef   | Townsville   | Lizard Island | Hick's Reef  | Taiwan       | Palau        | Palawan      | Cebu         | Scott Reef   |
|------------------|--------------|---------------|--------------|--------------|---------------|--------------|--------------|--------------|--------------|--------------|--------------|
| New Caledonia    | <b>0.171</b> |               |              |              |               |              |              |              |              |              |              |
| Swain Reef       | <b>0.204</b> | <b>0.058</b>  |              |              |               |              |              |              |              |              |              |
| Townsville       | <b>0.095</b> | <b>0.071</b>  | 0.011        |              |               |              |              |              |              |              |              |
| Lizard Island    | <b>0.110</b> | <b>0.063</b>  | <b>0.028</b> | <b>0.026</b> |               |              |              |              |              |              |              |
| Hick's Reef      | <b>0.079</b> | <b>0.079</b>  | -0.001       | -0.001       | <b>0.025</b>  |              |              |              |              |              |              |
| Taiwan           | <b>0.124</b> | <b>0.271</b>  | <b>0.229</b> | <b>0.194</b> | <b>0.199</b>  | <b>0.191</b> |              |              |              |              |              |
| Palau            | <b>0.071</b> | <b>0.189</b>  | <b>0.195</b> | <b>0.115</b> | <b>0.133</b>  | <b>0.112</b> | <b>0.040</b> |              |              |              |              |
| Palawan          | <b>0.082</b> | <b>0.166</b>  | <b>0.173</b> | <b>0.082</b> | <b>0.106</b>  | <b>0.064</b> | 0.021        | -0.018       |              |              |              |
| Cebu             | <b>0.087</b> | <b>0.207</b>  | <b>0.187</b> | <b>0.133</b> | <b>0.168</b>  | <b>0.138</b> | <b>0.166</b> | <b>0.113</b> | <b>0.047</b> |              |              |
| Scott Reef       | <b>0.172</b> | <b>0.206</b>  | <b>0.217</b> | <b>0.115</b> | <b>0.156</b>  | <b>0.128</b> | <b>0.180</b> | <b>0.140</b> | <b>0.123</b> | <b>0.180</b> |              |
| Abrolhos Islands | <b>0.065</b> | <b>0.187</b>  | <b>0.143</b> | <b>0.098</b> | <b>0.103</b>  | <b>0.104</b> | <b>0.098</b> | <b>0.076</b> | <b>0.032</b> | <b>0.124</b> | <b>0.043</b> |













| <i>Epinephelus polyphkadion</i> |         |         |        | <i>Plectropomus areolatus</i> |         |         |        | <i>Plectropomus leopardus</i> |         |         |        |
|---------------------------------|---------|---------|--------|-------------------------------|---------|---------|--------|-------------------------------|---------|---------|--------|
| Pop                             | Locus#1 | Locus#2 | P      | Pop                           | Locus#1 | Locus#2 | P      | Pop                           | Locus#1 | Locus#2 | P      |
| TM                              | EP35    | EP21    | 0.9489 | TS                            | Pb111   | Pma038  | 0.7137 | FJ                            | Ple002  | Ple005  | 0.3665 |
| TM                              | EP34    | EP21    | 0.1077 | TS                            | Pb120   | Pma038  | 0.0463 | FJ                            | Pma090  | Ple005  | 0.0053 |
| TM                              | EP02    | EP21    | 0.5882 | TS                            | Pa114   | Pma038  | 0.8813 | FJ                            | Pma112  | Ple005  | NA     |
| TM                              | EP11    | EP20    | 0.3542 | TS                            | Pa117   | Pma038  | 0.3301 | FJ                            | Pm3     | Ple005  | 1.0000 |
| TM                              | EP28    | EP20    | 0.7645 | TS                            | Pm6     | Pma038  | 0.6812 | FJ                            | Pma022  | Ple005  | 0.3328 |
| TM                              | EP25    | EP20    | 0.8565 | SO                            | Pm5     | Pm3     | 0.1827 |                               |         |         |        |
| TM                              | EP33    | EP20    | 1.0000 | SO                            | Pm5     | PaD2    | 0.9591 |                               |         |         |        |
| TM                              | EP09    | EP20    | 0.0052 | SO                            | Pm3     | PaD2    | 0.7634 |                               |         |         |        |
| TM                              | EP14    | EP20    | 0.8348 | SO                            | Pm5     | Pb111   | 0.6269 |                               |         |         |        |
| TM                              | EP35    | EP20    | 1.0000 | SO                            | Pm3     | Pb111   | 0.5025 |                               |         |         |        |
| TM                              | EP34    | EP20    | 0.4986 | SO                            | PaD2    | Pb111   | 0.5493 |                               |         |         |        |
| TM                              | EP02    | EP20    | 0.2346 | SO                            | Pm5     | Pb120   | 0.1576 |                               |         |         |        |
| TM                              | EP21    | EP20    | 0.8009 | SO                            | Pm3     | Pb120   | 0.0776 |                               |         |         |        |
| CK                              | EP11    | EP28    | 1.0000 | SO                            | PaD2    | Pb120   | 0.3499 |                               |         |         |        |
| CK                              | EP11    | EP25    | 0.1731 | SO                            | Pb111   | Pb120   | 0.8223 |                               |         |         |        |
| CK                              | EP28    | EP25    | 0.7996 | SO                            | Pm5     | Pa114   | 0.2615 |                               |         |         |        |
| CK                              | EP11    | EP33    | 0.1507 | SO                            | Pm3     | Pa114   | 0.5939 |                               |         |         |        |
| CK                              | EP28    | EP33    | 0.0445 | SO                            | PaD2    | Pa114   | 0.6078 |                               |         |         |        |
| CK                              | EP25    | EP33    | 0.9750 | SO                            | Pb111   | Pa114   | 0.0793 |                               |         |         |        |
| CK                              | EP11    | EP09    | 0.0687 | SO                            | Pb120   | Pa114   | 0.2835 |                               |         |         |        |
| CK                              | EP28    | EP09    | 0.4672 | SO                            | Pm5     | Pa117   | 0.8810 |                               |         |         |        |
| CK                              | EP25    | EP09    | 0.0494 | SO                            | Pm3     | Pa117   | 0.3047 |                               |         |         |        |
| CK                              | EP33    | EP09    | 0.0725 | SO                            | PaD2    | Pa117   | 0.8876 |                               |         |         |        |
| CK                              | EP11    | EP14    | 0.5002 | SO                            | Pb111   | Pa117   | 0.5270 |                               |         |         |        |
| CK                              | EP28    | EP14    | 0.5795 | SO                            | Pb120   | Pa117   | 0.7648 |                               |         |         |        |
| CK                              | EP25    | EP14    | 0.9785 | SO                            | Pa114   | Pa117   | 0.7081 |                               |         |         |        |
| CK                              | EP33    | EP14    | 0.7884 | SO                            | Pm5     | Pm6     | 0.3183 |                               |         |         |        |
| CK                              | EP09    | EP14    | 0.3494 | SO                            | Pm3     | Pm6     | 0.5732 |                               |         |         |        |
| CK                              | EP11    | EP35    | 0.6688 | SO                            | PaD2    | Pm6     | 0.9896 |                               |         |         |        |
| CK                              | EP28    | EP35    | 0.5964 | SO                            | Pb111   | Pm6     | 0.7435 |                               |         |         |        |
| CK                              | EP25    | EP35    | 0.6219 | SO                            | Pb120   | Pm6     | 1.0000 |                               |         |         |        |
| CK                              | EP33    | EP35    | 1.0000 | SO                            | Pa114   | Pm6     | 0.6482 |                               |         |         |        |
| CK                              | EP09    | EP35    | 0.0552 | SO                            | Pa117   | Pm6     | 0.1375 |                               |         |         |        |
| CK                              | EP14    | EP35    | 0.0204 | SO                            | Pm5     | Pma038  | 0.9110 |                               |         |         |        |
| CK                              | EP11    | EP34    | 0.8713 | SO                            | Pm3     | Pma038  | 0.0390 |                               |         |         |        |
| CK                              | EP28    | EP34    | 0.4752 | SO                            | PaD2    | Pma038  | 0.0285 |                               |         |         |        |
| CK                              | EP25    | EP34    | 0.7307 | SO                            | Pb111   | Pma038  | 0.2134 |                               |         |         |        |
| CK                              | EP33    | EP34    | 0.1291 | SO                            | Pb120   | Pma038  | 0.8786 |                               |         |         |        |
| CK                              | EP09    | EP34    | 0.5426 | SO                            | Pa114   | Pma038  | 0.2019 |                               |         |         |        |
| CK                              | EP14    | EP34    | 1.0000 | SO                            | Pa117   | Pma038  | 0.3515 |                               |         |         |        |
| CK                              | EP35    | EP34    | 1.0000 | SO                            | Pm6     | Pma038  | 0.1348 |                               |         |         |        |
| CK                              | EP11    | EP02    | 0.4018 | FJ                            | Pm5     | Pm3     | 0.5820 |                               |         |         |        |
| CK                              | EP28    | EP02    | 0.0278 | FJ                            | Pm5     | PaD2    | 0.0824 |                               |         |         |        |
| CK                              | EP25    | EP02    | 0.2497 | FJ                            | Pm3     | PaD2    | 0.5621 |                               |         |         |        |
| CK                              | EP33    | EP02    | 0.3746 | FJ                            | Pm5     | Pb111   | 0.3607 |                               |         |         |        |
| CK                              | EP09    | EP02    | 0.2604 | FJ                            | Pm3     | Pb111   | 0.7029 |                               |         |         |        |
| CK                              | EP14    | EP02    | 0.8986 | FJ                            | PaD2    | Pb111   | 0.3995 |                               |         |         |        |
| CK                              | EP35    | EP02    | 0.8019 | FJ                            | Pm5     | Pb120   | 0.1477 |                               |         |         |        |
| CK                              | EP34    | EP02    | 0.4812 | FJ                            | Pm3     | Pb120   | 0.9548 |                               |         |         |        |
| CK                              | EP11    | EP21    | 0.0037 | FJ                            | PaD2    | Pb120   | 0.0081 |                               |         |         |        |
| CK                              | EP28    | EP21    | 0.6577 | FJ                            | Pb111   | Pb120   | 0.5267 |                               |         |         |        |
| CK                              | EP25    | EP21    | 0.9718 | FJ                            | Pm5     | Pa114   | 0.8538 |                               |         |         |        |
| CK                              | EP33    | EP21    | 0.2280 | FJ                            | Pm3     | Pa114   | 0.9982 |                               |         |         |        |
| CK                              | EP09    | EP21    | 0.6612 | FJ                            | PaD2    | Pa114   | 0.1730 |                               |         |         |        |
| CK                              | EP14    | EP21    | 0.0339 | FJ                            | Pb111   | Pa114   | 0.2939 |                               |         |         |        |
| CK                              | EP35    | EP21    | 0.7979 | FJ                            | Pb120   | Pa114   | 0.5513 |                               |         |         |        |
| CK                              | EP34    | EP21    | 1.0000 | FJ                            | Pm5     | Pa117   | 0.9805 |                               |         |         |        |
| CK                              | EP02    | EP21    | 0.6532 | FJ                            | Pm3     | Pa117   | 0.0429 |                               |         |         |        |
| CK                              | EP11    | EP20    | 0.4740 | FJ                            | PaD2    | Pa117   | 0.7170 |                               |         |         |        |
| CK                              | EP28    | EP20    | 0.7064 | FJ                            | Pb111   | Pa117   | 0.3774 |                               |         |         |        |
| CK                              | EP25    | EP20    | 0.9953 | FJ                            | Pb120   | Pa117   | 0.5036 |                               |         |         |        |
| CK                              | EP33    | EP20    | 0.7540 | FJ                            | Pa114   | Pa117   | 0.9401 |                               |         |         |        |
| CK                              | EP09    | EP20    | 0.0618 | FJ                            | Pm5     | Pm6     | 1.0000 |                               |         |         |        |
| CK                              | EP14    | EP20    | 0.7960 | FJ                            | Pm3     | Pm6     | 0.7962 |                               |         |         |        |
| CK                              | EP35    | EP20    | 0.7820 | FJ                            | PaD2    | Pm6     | 0.6547 |                               |         |         |        |
| CK                              | EP34    | EP20    | 0.1706 | FJ                            | Pb111   | Pm6     | 0.8325 |                               |         |         |        |
| CK                              | EP02    | EP20    | 0.9117 | FJ                            | Pb120   | Pm6     | 0.8117 |                               |         |         |        |
| CK                              | EP21    | EP20    | 0.6733 | FJ                            | Pa114   | Pm6     | 0.4756 |                               |         |         |        |
|                                 |         |         |        | FJ                            | Pa117   | Pm6     | 0.9524 |                               |         |         |        |
|                                 |         |         |        | FJ                            | Pm5     | Pma038  | 0.7875 |                               |         |         |        |
|                                 |         |         |        | FJ                            | Pm3     | Pma038  | 0.8252 |                               |         |         |        |
|                                 |         |         |        | FJ                            | PaD2    | Pma038  | 0.2413 |                               |         |         |        |
|                                 |         |         |        | FJ                            | Pb111   | Pma038  | 0.7707 |                               |         |         |        |
|                                 |         |         |        | FJ                            | Pb120   | Pma038  | 0.9910 |                               |         |         |        |
|                                 |         |         |        | FJ                            | Pa114   | Pma038  | 0.8919 |                               |         |         |        |
|                                 |         |         |        | FJ                            | Pa117   | Pma038  | 0.9809 |                               |         |         |        |
|                                 |         |         |        | FJ                            | Pm6     | Pma038  | 0.6458 |                               |         |         |        |

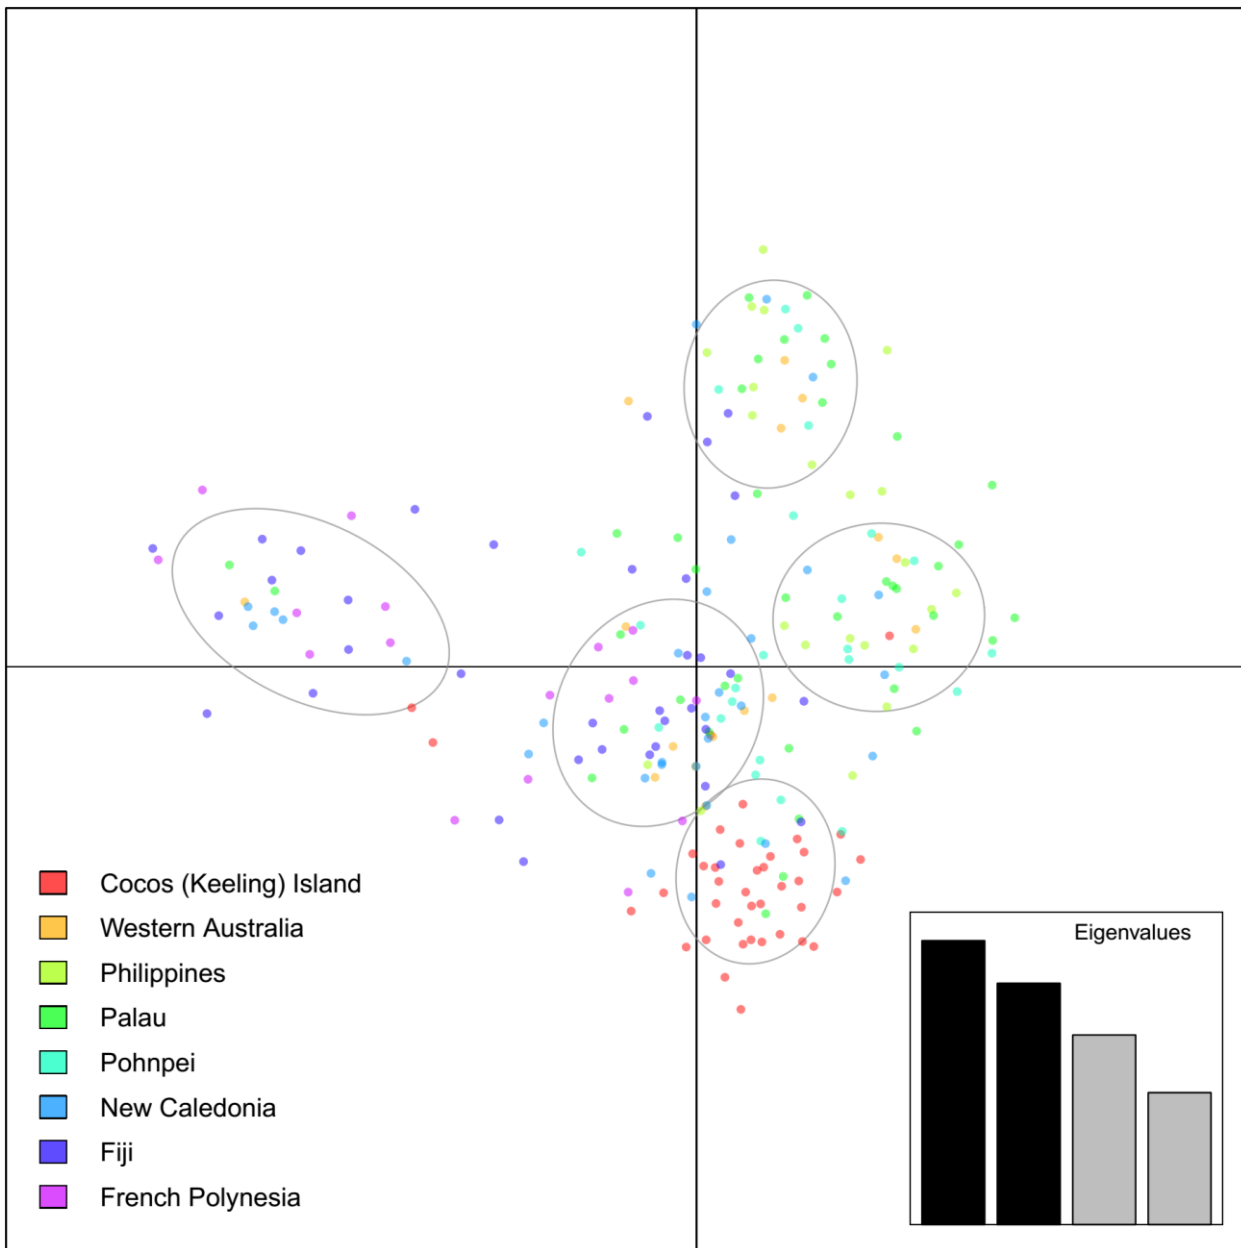

Figure S1. Discriminant analysis of principal components (DAPC) scatter plots of *Epinephelus polyphekadion* Central Indo-Pacific populations based on 11 microsatellite loci with 5 clusters defined.

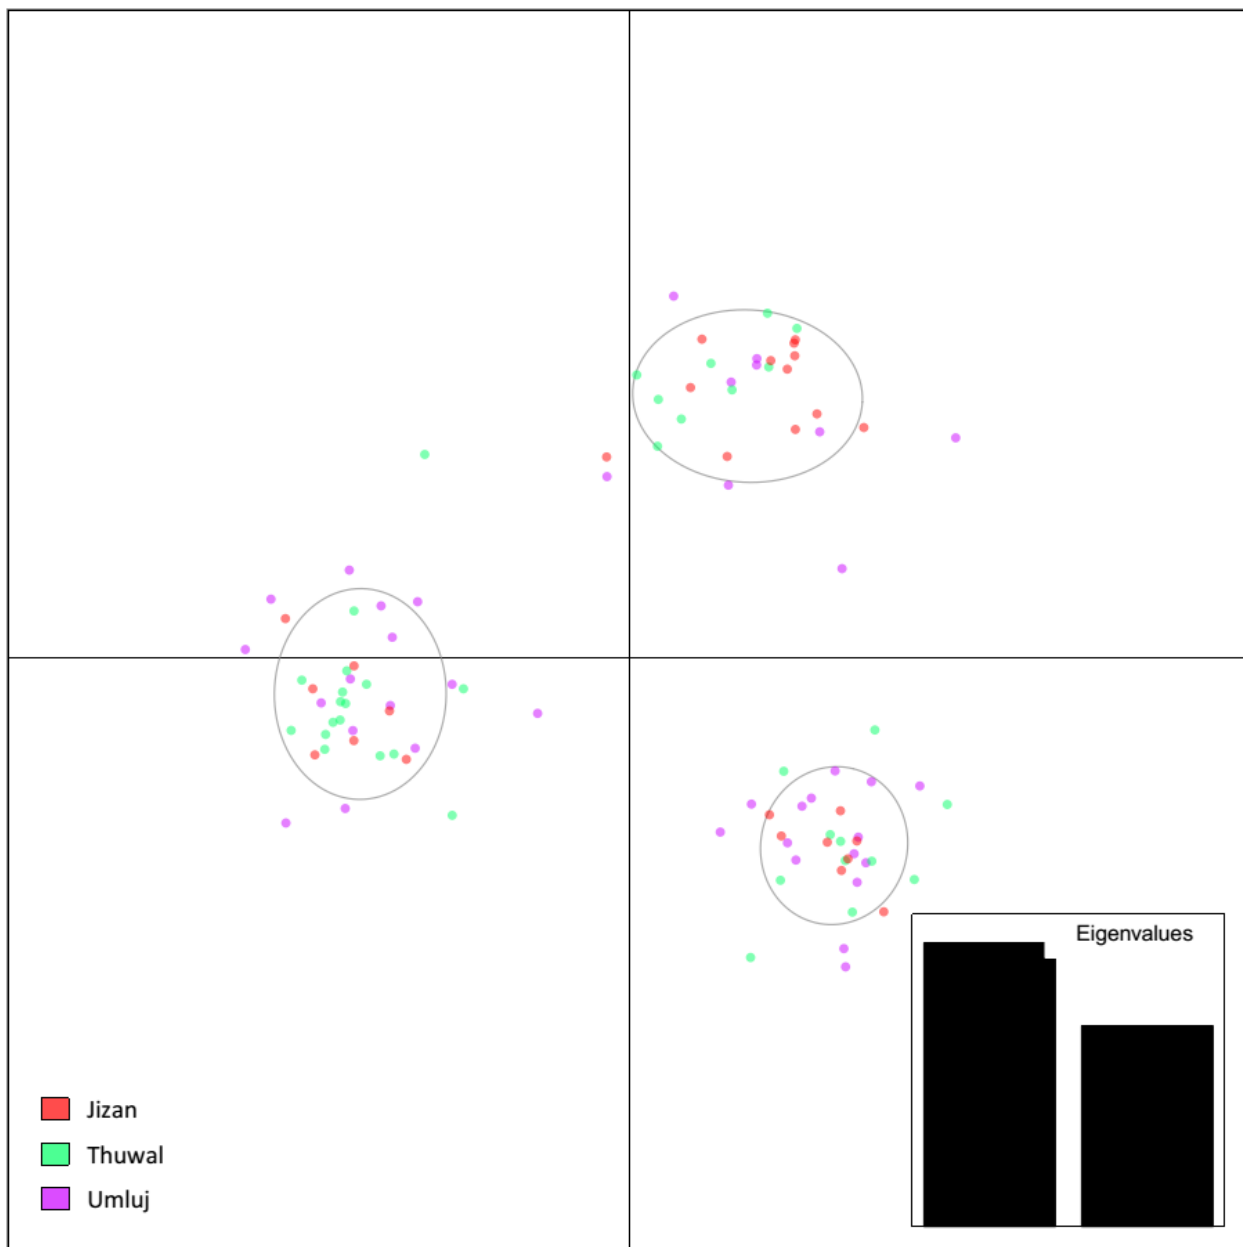

Figure S2. Discriminant analysis of principal components (DAPC) scatter plots of *Plectropomus areolatus* Red Sea populations based on 9 microsatellite loci with 3 clusters defined.

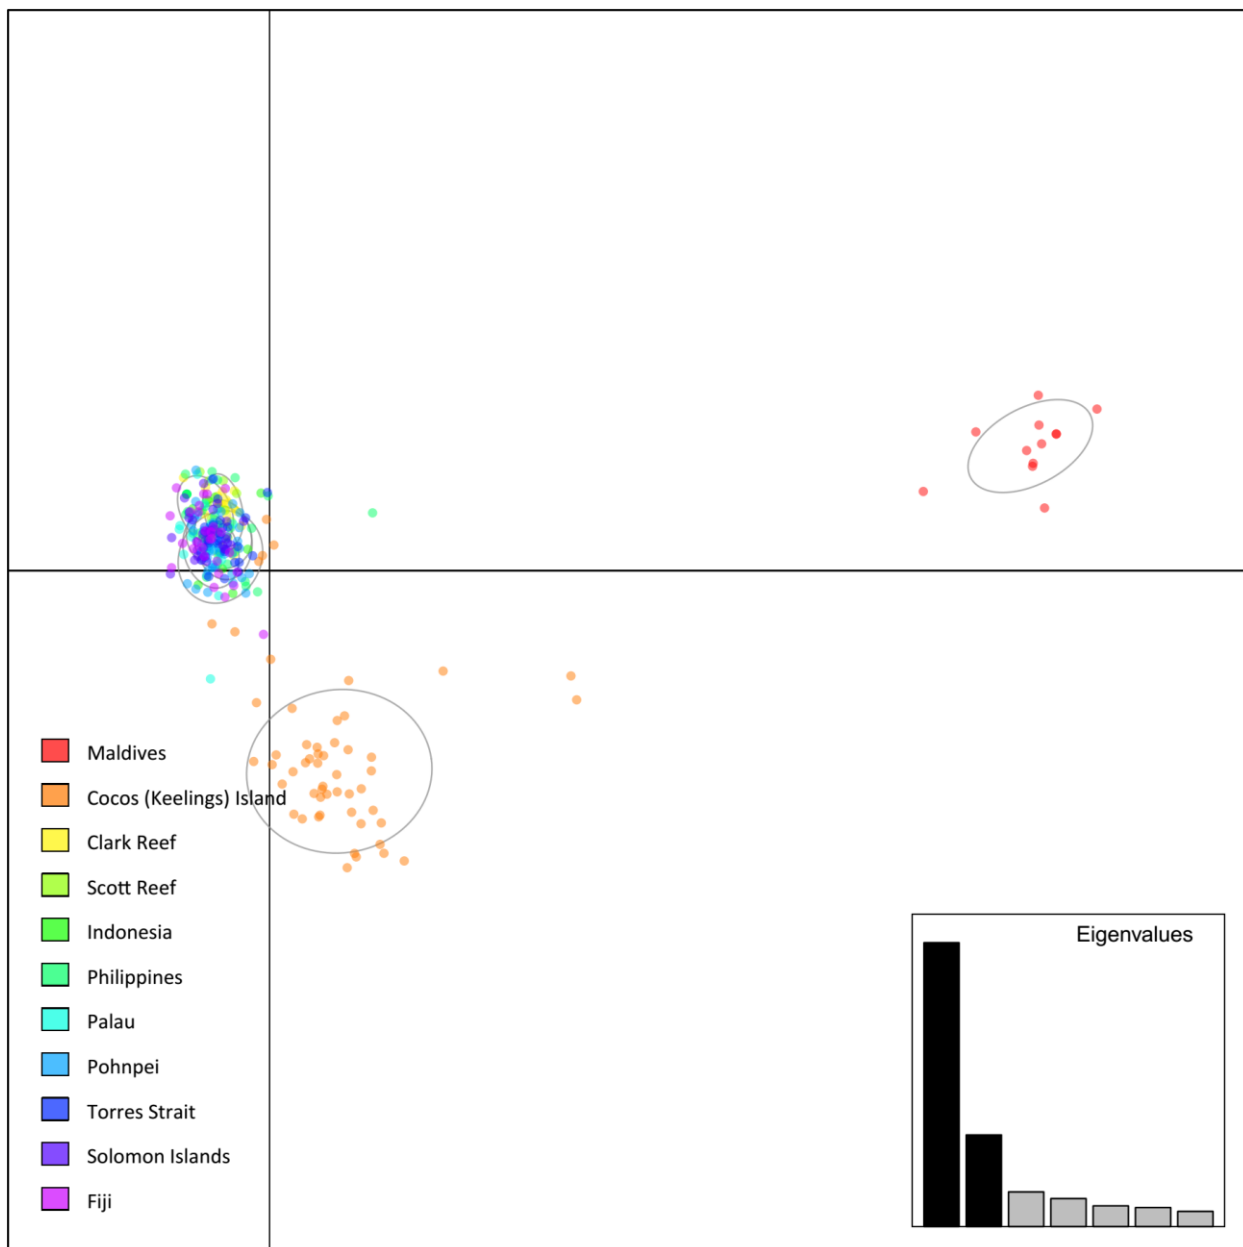

Figure S3. Discriminant analysis of principal components (DAPC) scatter plots of *Plectropomus areolatus* Central Indian Ocean Islands and Central Indo-Pacific populations based on 9 microsatellite loci with 9 clusters defined.

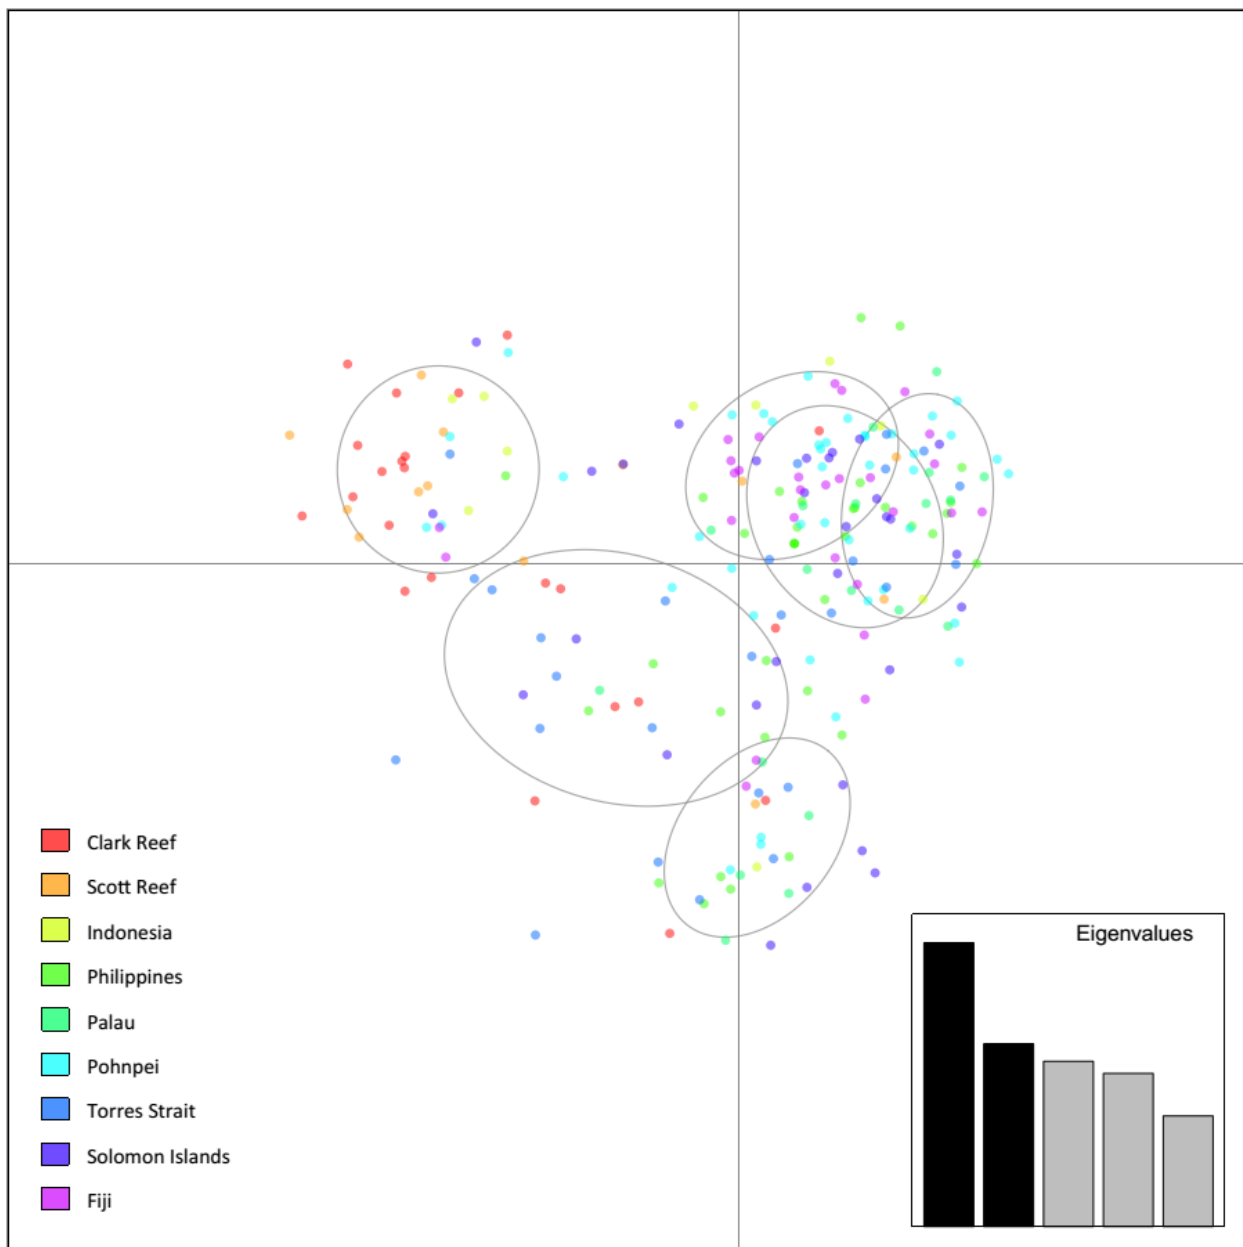

Figure S4. Discriminant analysis of principal components (DAPC) scatter plots of *Plectropomus areolatus* Western Australia + Pacific Ocean populations based on 9 microsatellite loci with 6 clusters defined.

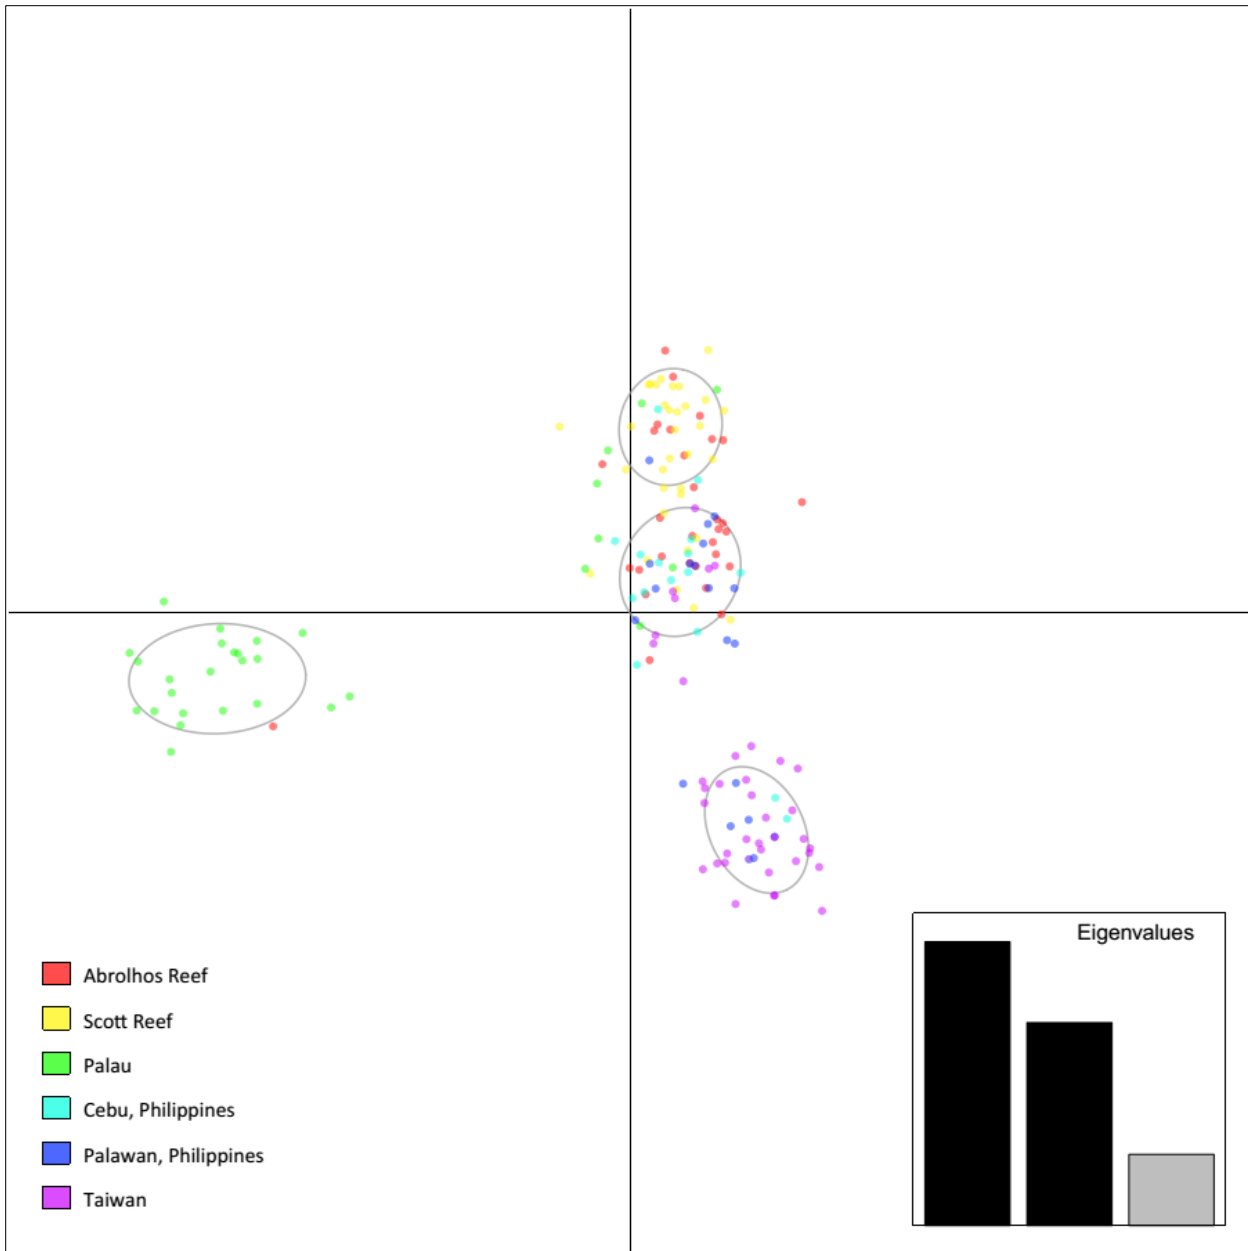

Figure S5. Discriminant analysis of principal components (DAPC) scatter plots of *Plectropomus leopardus* Western populations based on 9 microsatellite loci with 4 clusters defined.

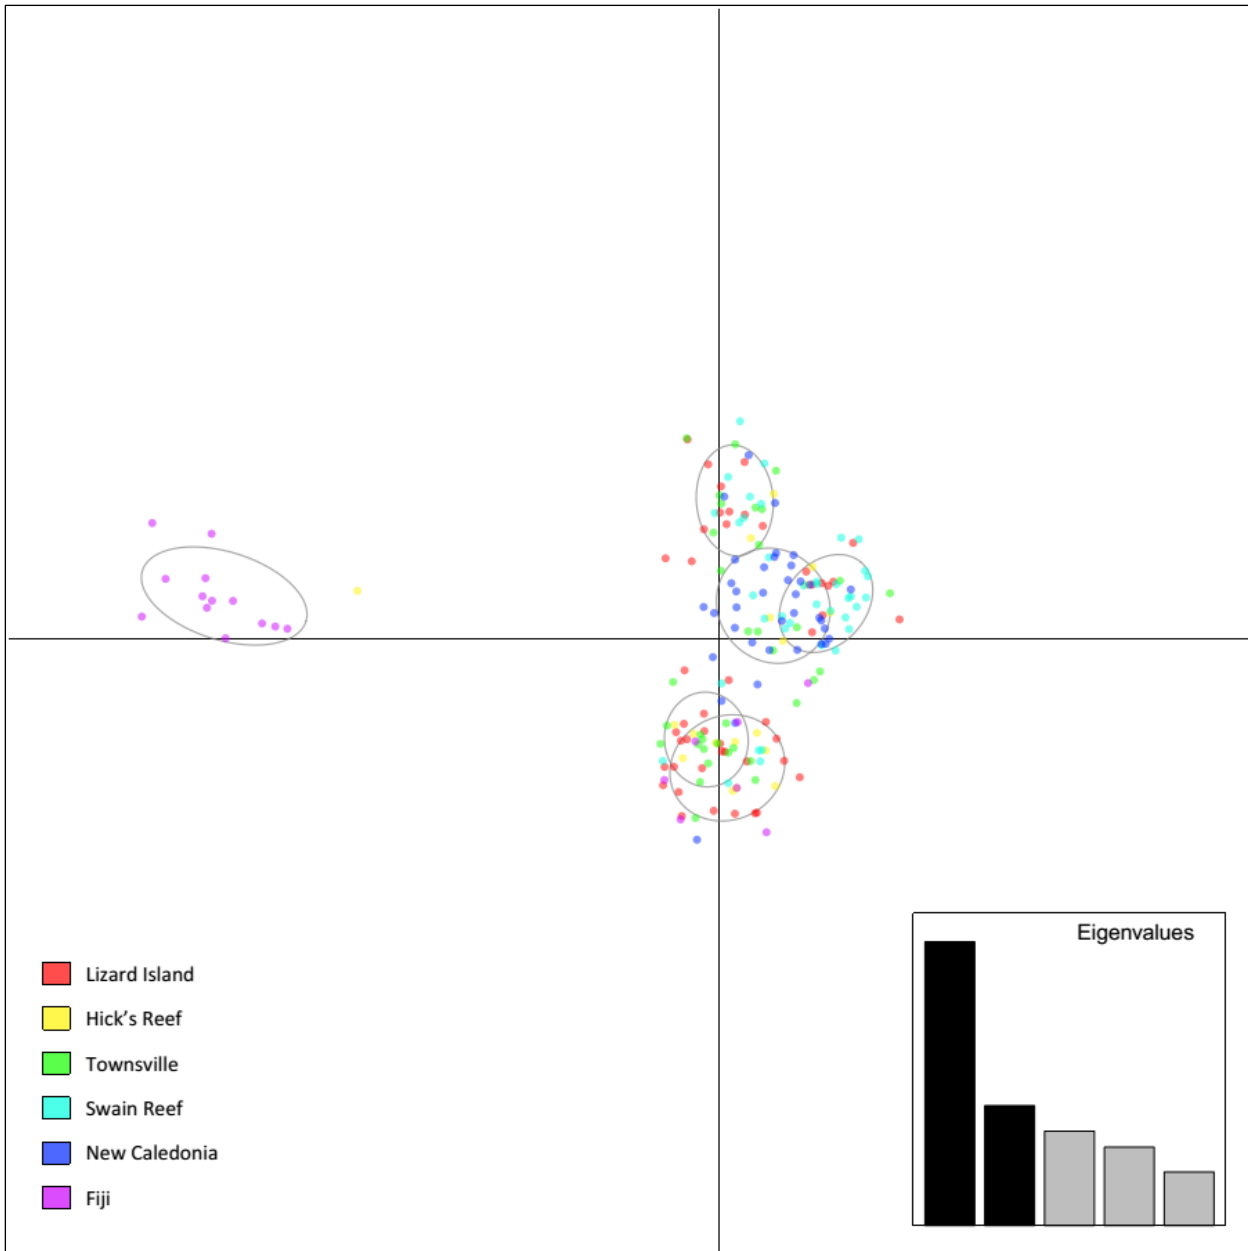

Figure S6. Discriminant analysis of principal components (DAPC) scatter plots of *Plectropomus leopardus* Eastern populations based on 9 microsatellite loci with 6 clusters defined.

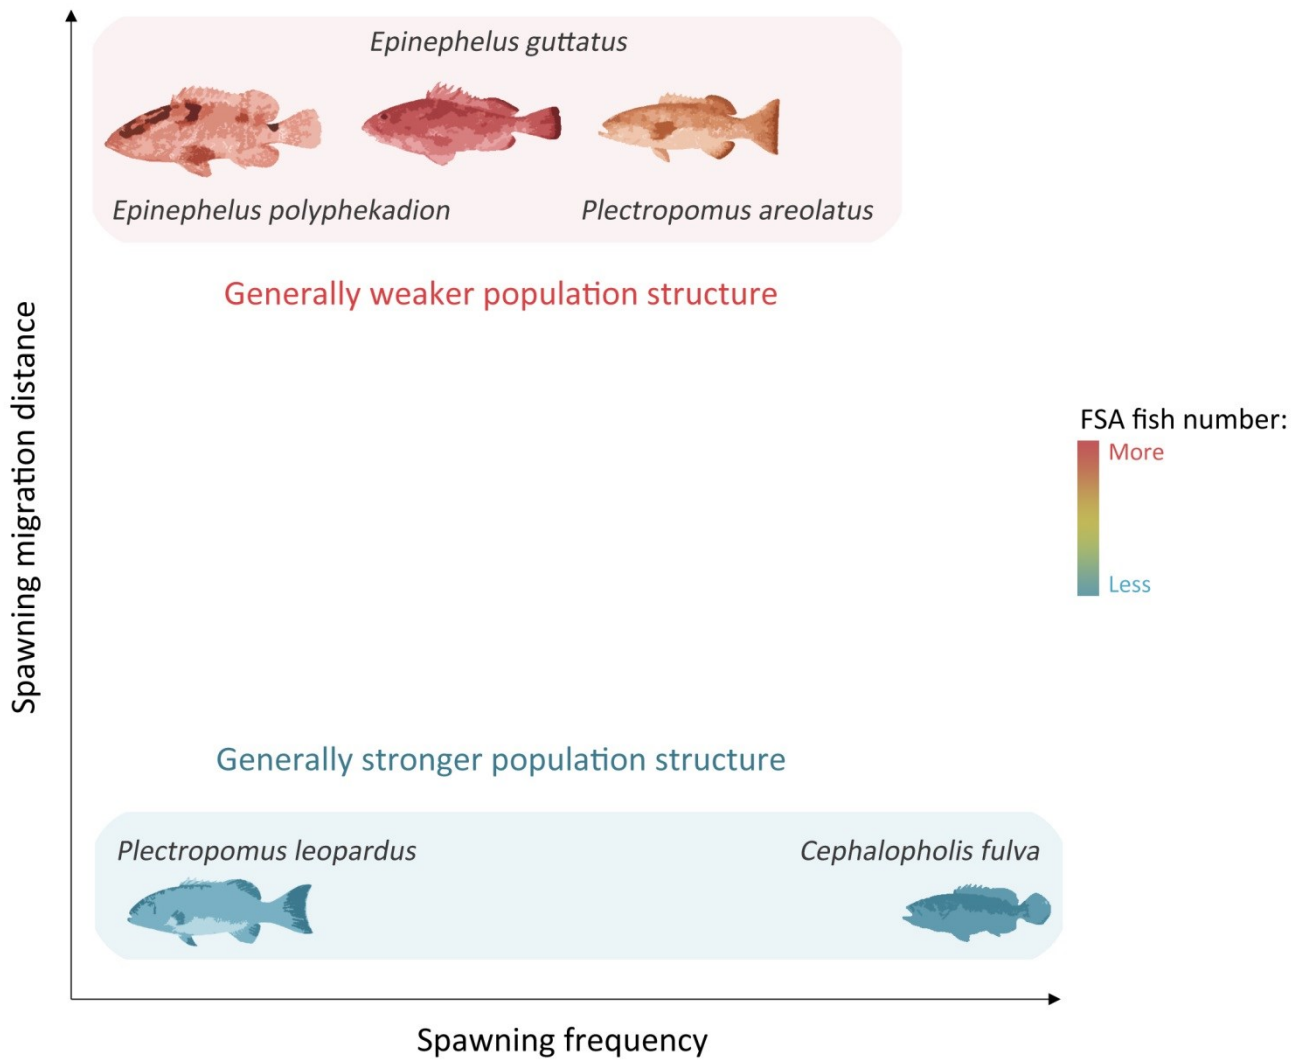

Figure S7. Summary of population genetic structure and reproductive characteristics of five grouper species analysed in this study and Portnoy et al. (2013).
